# Supplementary material
Source: publisher figshare collection journal article supplement (https://gsapubs.figshare.com/articles/dataset/_/19783093)
Supplement: Supplementary file 1 [file 1]

## Sheet: Apatite point analysis
SAMPLE NAME	Apatite #	Deposit	host	F	Na2O	MgO	FeO	MnO	Ce2O3	CaO	Cl	P2O5	SiO2	SO3	O	TOTAL	F %ERR	Na %ERR	Mg %ERR	Fe %ERR	Mn %ERR	Ce %ERR	Ca %ERR	Cl %ERR	P %ERR	Si %ERR	S %ERR
RBL11-1s_pl1_ap1_rim	Ap1	sub-plinian	pyx	1.8499	0.137232	0.411279	0.493555	0.175711	0.095425	53.9542	1.43467	42.7244	0.265948	0.390571	0	101.933	2.19423	20.1766	2.36561	4.40906	8.91671	32.9474	0.414619	0.866116	0.935531	9.49217	3.25409
RBL11-1s_pl1_ap1_core1			pyx	1.82849	0.085236	0.428117	0.473459	0.116082	0.09427	53.6746	1.46055	42.0536	0.273952	0.354398	0	100.843	2.23417	32.8218	2.30286	4.65159	13.592	33.1388	0.415595	0.862078	0.943237	9.22134	3.39902
RBL11-1s_pl1_ap1_core2			pyx	1.80219	0.084734	0.406262	0.545513	0.114201	0.056073	53.5172	1.48692	42.4074	0.213715	0.327446	-1e-05	100.962	2.21889	33.4616	2.38358	4.09257	13.5199	56.5824	0.416239	0.852503	0.93921	11.32	3.62861
RBL11-1s_pl1_ap2_1	Ap2		mat	1.75436	0.106902	0.418591	0.661854	0.111409	0.053691	52.8203	1.4556	40.9778	0.212897	0.304918	0	98.8783	2.2579	26.5362	2.35811	3.5275	13.7338	58.2641	0.419105	0.86227	0.955333	11.6757	3.90141
RBL11-1s_pl1_ap2_2			mat	1.77867	0.170937	0.401228	0.599041	0.148304	0.039388	54.0662	1.44137	41.4976	0.220187	0.325235	4e-06	100.688	2.26592	16.1897	2.40787	3.80352	10.6342	83.0547	0.413766	0.86636	0.94934	10.4269	3.61725
RBL11-1s_pl1_ap3_1	Ap3		mat	1.74859	0.090506	0.4126	0.51971	0.127256	0.070382	53.718	1.4747	42.9412	0.283328	0.346522	0	101.733	2.26	33.3358	2.33641	4.15457	12.4917	45.3901	0.415407	0.854149	0.932105	8.95828	3.48055
RBL11-1s_pl1_ap3_2			mat	1.7556	0.203815	0.401754	0.516684	0.114227	0.048922	52.9889	1.49097	41.3566	0.241714	0.381837	0	99.501	2.2581	15.1541	2.43165	4.28043	13.3601	62.6407	0.418382	0.85029	0.95081	10.4918	3.20886
RBL11-1s_pl1_ap4_1	Ap4		mat	1.83698	0.101625	0.41143	0.512575	0.114295	0.115826	53.563	1.45679	41.8919	0.242362	0.30996	8e-06	100.557	2.19388	27.2536	2.342	4.26392	13.4609	26.9921	0.416316	0.861506	0.945031	10.0814	3.81791
RBL11-1s_pl1_ap4_2			mat	1.83124	0.086611	0.401251	0.451037	0.086287	0.128937	53.3987	1.45589	42.1981	0.30423	0.366213	-1e-05	100.709	2.19213	32.5098	2.43543	4.76347	17.9844	25.1205	0.416767	0.864688	0.940875	8.67127	3.3208
RBL11-1s_px1_ap1	Ap5		pyx	1.79551	0.10959	0.421396	0.695172	0.146813	0.102554	52.5719	1.50225	41.4067	0.432806	0.358858	4e-06	99.5436	2.25039	26.4168	2.34921	3.41123	10.6691	30.9537	0.420112	0.844991	0.94948	6.89719	3.39919
RBL11-1s_px1_ap2	Ap6		pyx	1.82647	0.080567	0.423593	0.666299	0.148169	0.070356	53.2489	1.43652	41.8106	0.382499	0.346968	0	100.441	2.1958	34.2558	2.33613	3.47457	10.7313	45.3963	0.417144	0.869247	0.94546	7.40423	3.5065
RBL11-1s_px1_ap3	Ap7		pyx	1.7658	0.070843	0.442164	0.605994	0.158088	0.025058	53.3811	1.47993	40.9068	0.280823	0.362844	0	99.4794	2.28931	39.8579	2.2471	3.86818	9.85235	126.535	0.416733	0.850413	0.955998	9.46195	3.40961
RBL11-1s_px1_ap4	Ap8		pyx	1.83762	0.138022	0.414419	0.693634	0.125341	0.021621	52.9747	1.47237	40.9863	0.341582	0.487662	8e-06	99.4933	2.17539	21.826	2.35182	3.4757	12.5163	150.35	0.419837	0.861425	0.957823	7.82832	2.75216
RBL11-1s_px1_ap5	Ap9		pyx	1.7289	0.123335	0.427081	0.501059	0.107968	0.117721	53.5427	1.46159	43.2962	0.268393	0.343438	-2e-05	101.918	2.29275	23.0175	2.2969	4.34974	14.4766	26.8151	0.417873	0.863696	0.931978	9.26732	3.53871
RBL11-1s_px1_ap6	Ap10		pyx	1.78273	0.224465	0.422011	0.672973	0.122027	0.05044	53.2696	1.38775	42.0375	0.333036	0.413717	0	100.716	2.24537	13.8998	2.34312	3.50392	13.1854	62.7145	0.418351	0.889057	0.946686	8.39888	3.09583
RBL11-1s_px1_ap7	Ap11		pyx	1.73466	0.140135	0.412199	0.642462	0.119283	0.110551	52.803	1.42215	42.5636	0.339879	0.351443	0	100.639	2.30313	20.6611	2.39046	3.63055	13.1953	28.7773	0.42104	0.876198	0.940935	7.83656	3.5725
RBL11-1s_px2_ap1	Ap12		pyx	1.79785	0.086866	0.408208	0.545179	0.121559	0.015605	53.4327	1.47812	42.7683	0.258718	0.436307	0	101.349	2.23323	32.2885	2.40297	4.1442	12.9966	197.625	0.418025	0.858699	0.937759	10.2585	2.96997
RBL11-1s_px2_ap2	Ap13		pyx	1.85514	0.135124	0.409785	0.540327	0.084066	0.026447	53.2755	1.43951	40.7196	0.314761	0.467074	-1e-05	99.2673	2.18429	22.1505	2.38259	4.07372	18.5013	118.72	0.418679	0.868561	0.961747	8.65116	2.8446
RBL11-1s_px2_ap3	Ap14		pyx	1.80513	0.215951	0.433671	0.714104	0.128666	0.075683	53.2657	1.5049	43.1993	0.328289	0.523503	4e-06	102.195	2.22751	14.1204	2.2693	3.33468	12.7442	41.2342	0.418772	0.851265	0.933626	8.05695	2.64389
RBL11-1s_px2_ap3_1			pyx	1.71191	0.139853	0.410153	0.700226	0.137287	0.054143	53.6522	1.47457	42.1828	0.311165	0.536594	4e-06	101.311	2.3421	21.2282	2.37687	3.40755	11.3024	58.9069	0.417392	0.861046	0.943882	8.53631	2.61266
RBL11-1s_px2_ap4_1	Ap15		pyx	1.79477	0.095655	0.400889	0.59697	0.146299	0.001192	53.2325	1.47077	40.4691	0.285436	0.376367	0	98.87	2.25604	29.9591	2.45373	3.78368	10.7215	2598.81	0.419087	0.860176	0.96641	8.93619	3.27829
RBL11-1s_px2_ap4_2			pyx	1.76488	0.136532	0.412734	0.579864	0.123621	0.038492	53.489	1.45583	41.0265	0.298267	0.467754	0	99.7935	2.27817	21.8784	2.35937	3.94685	12.6211	82.3872	0.418073	0.863338	0.958123	9.02876	2.83281
RBL11-1s_px3-4_ap2_1	Ap16		pyx	1.75273	0.130812	0.413143	0.478997	0.141921	0.109428	52.9443	1.48751	42.7856	0.313752	0.542371	0	101.101	2.28175	20.4262	2.35709	4.53614	10.9759	28.4353	0.420361	0.856261	0.938397	8.43305	2.58167
RBL11-1s_px3-4_ap2_2			pyx	1.77326	0.249905	0.413629	0.564995	0.123124	0.073351	52.6742	1.48866	41.4842	0.398622	0.913167	0	100.157	2.25476	13.0439	2.3702	3.98923	12.7866	43.3555	0.421278	0.852726	0.953027	7.32479	1.84986
RBL11-1s_px3-4_ap2_3			pyx	1.78273	0.126205	0.425199	0.641597	0.137682	0.040887	53.2164	1.47826	42.0221	0.305311	0.441933	0	100.618	2.25128	23.1082	2.30692	3.62202	11.6807	76.7137	0.419199	0.86011	0.94684	8.87906	2.90528
RBL11-1s_px3-4_ap3_1	Ap17		pyx	1.86577	0.193011	0.413719	0.545601	0.135209	0.093714	52.9801	1.45589	41.8754	0.33913	0.48052	-1e-05	100.378	2.18711	15.5769	2.3399	4.11343	11.4734	33.7744	0.419875	0.862034	0.947268	8.01976	2.80192
RBL11-1s_px3-4_ap3_2			pyx	1.82652	0.241469	0.419063	0.566413	0.127206	0.139331	53.032	1.46111	42.0692	0.338228	0.718184	4e-06	100.939	2.20346	12.5972	2.33691	4.05116	12.5437	22.8152	0.419825	0.862472	0.945954	8.02918	2.16363
RBL11-1s_px3-4_ap3_3			pyx	1.73583	0.166177	0.421112	0.556789	0.126856	0.009609	53.0843	1.47555	41.8353	0.252677	0.602671	8e-06	100.267	2.31952	18.316	2.31467	4.02837	12.4522	324.486	0.419552	0.858675	0.949257	10.9672	2.41061
RBL11-1s_px3-4_ap4	Ap18		pyx	1.78862	0.139571	0.416039	0.579459	0.123878	0.10807	52.9708	1.48573	42.7888	0.28228	0.380428	4e-06	101.064	2.23109	20.0345	2.35031	3.91093	12.6087	28.6749	0.419801	0.856916	0.938097	9.6888	3.27695
RBL11-1s_px3-4_ap5	Ap19		pyx	1.82568	0.183906	0.404468	0.633386	0.109767	0.07325	53.3806	1.46471	40.6824	0.241306	0.422373	0	99.4219	2.2067	15.8088	2.42266	3.64396	14.1834	40.0855	0.418133	0.859631	0.962306	10.6521	3.01154
RBL11-1s_px3-4_ap6	Ap20		mat	1.79326	0.143718	0.414163	0.501992	0.12258	0.049265	53.2893	1.49346	43.3356	0.310695	0.444468	0	101.899	2.24419	20.048	2.35264	4.318	13.011	62.444	0.41865	0.854249	0.931725	8.78556	2.98663
RBL11-1s_px3-4_ap7	Ap21		pyx	1.72851	0.117535	0.423472	0.66026	0.138502	0.056463	52.9375	1.40264	41.6188	0.331605	0.393724	4e-06	99.8089	2.31236	24.9387	2.31628	3.61779	11.5246	59.0391	0.420148	0.882674	0.95206	7.85414	3.27034
RBL11-1s_px3-4_ap8	Ap22		pyx	1.65434	0.157442	0.40175	0.656525	0.138812	0.097228	52.4449	1.42363	39.7403	0.772219	0.375044	0	97.8622	2.38295	18.94	2.42618	3.58134	11.1744	32.1739	0.421545	0.875191	0.973504	4.85565	3.33805
RBL11-1s_px3-4_ap9	Ap23		pyx	1.75627	0.124755	0.688929	0.849989	0.120566	0.127238	52.831	1.38939	40.6389	1.17217	0.324187	-1e-05	100.023	2.27074	23.072	1.63256	2.9673	12.9027	24.2441	0.420477	0.886878	0.963796	3.84775	3.64126
RBL11-1s_px3-4_ap10	Ap24		mat	1.91128	0.136971	0.409921	0.463739	0.132765	0.067244	53.0746	1.42726	41.9185	0.388649	0.37298	4e-06	100.304	2.13027	21.9608	2.36845	4.68455	11.663	46.9155	0.419159	0.873501	0.947717	7.32608	3.37178
RBL11-1s_px3-4_ap11	Ap25		mat	1.73695	0.146593	0.401871	0.515873	0.111083	0.068378	52.7756	1.46038	41.4311	0.362687	0.426487	0	99.437	2.31493	18.9675	2.42367	4.18509	13.8619	47.0548	0.42013	0.861755	0.952351	7.69149	3.02599
RBL11-1s_px3-4_ap12_rim	Ap26		mat	1.83667	0.163047	0.412149	0.500326	0.119471	0.070758	52.839	1.43611	40.3971	0.399365	0.366417	0	98.5405	2.19321	17.1246	2.37154	4.38824	13.1043	44.9389	0.41969	0.870888	0.964183	7.16647	3.32904
RBL11-1s_px3-4_ap12_core			mat	1.78894	0.124189	0.407542	0.490503	0.133538	0.031172	52.7124	1.50107	42.7332	0.247913	0.462864	0	100.633	2.24461	22.7112	2.34991	4.37659	11.7101	100.645	0.420675	0.852284	0.937402	10.31	2.88041
RBL11-1s_px3-4_ap12_core2			mat	1.77387	0.131718	0.392577	0.443874	0.149639	0.133271	52.8969	1.43324	41.6756	0.253192	0.404487	4e-06	99.6884	2.24943	21.6792	2.48177	4.80538	10.7055	23.7098	0.419689	0.871468	0.948721	9.75561	3.1621
RBL11-1s_px3-4_ap13	Ap27		pyx	1.821	0.140055	0.407481	0.761921	0.14498	0.108069	53.184	1.43984	41.3948	0.273364	0.368214	0	100.044	2.2133	20.3002	2.37659	3.17765	10.5329	29.8196	0.418743	0.871097	0.953382	9.7359	3.3885
RBL11-1s_px3-4_ap14	Ap28		pyx	1.81211	0.18366	0.431991	0.69838	0.142541	0.105587	53.0304	1.47184	41.3025	0.360031	0.537856	4e-06	100.077	2.22169	15.9428	2.26731	3.36732	11.078	29.7693	0.41918	0.859537	0.954616	7.74377	2.59888
RBL11-1s_px5_ap1	Ap29		pyx	1.80232	0.144445	0.421835	0.677536	0.104577	0.038401	52.7094	1.4697	40.8752	0.267916	0.498081	0	99.0094	2.25818	18.8954	2.29396	3.51657	14.9751	80.0702	0.420633	0.859138	0.958477	9.88267	2.69885
RBL11-1s_px5_ap5	Ap30		pyx	1.78853	0.141044	0.415712	0.641151	0.157502	0.075578	53.2273	1.46548	41.2915	0.282634	0.440816	0	99.9273	2.24083	20.6647	2.33754	3.63913	10.0753	42.2726	0.418508	0.861818	0.953956	9.13141	2.96812
RBL11-1s_px5_ap4	Ap31		mat	1.75966	0.184905	0.404512	0.934141	0.126605	0.079176	52.7556	1.44301	41.5212	0.243393	0.444054	0	99.8963	2.27277	15.5359	2.40264	2.76671	12.5715	40.0408	0.420542	0.86961	0.952936	9.85478	2.95939
RBL11-1s_px5_ap3	Ap32		pyx	1.80746	0.15598	0.424897	0.578856	0.134023	0.070774	52.7295	1.38249	40.5052	0.311954	0.429011	0	98.5301	2.20259	17.762	2.27864	3.90154	11.6128	45.0905	0.420592	0.88866	0.963978	8.48505	3.00169
RBL11-1s_px5_ap2	Ap33		mat	1.76889	0.190331	0.403368	0.459351	0.145867	0.085221	52.9235	1.4639	41.854	0.321267	0.476728	0	100.092	2.27236	14.7087	2.37419	4.72419	10.7811	38.1071	0.419985	0.861541	0.948456	8.40706	2.74456
RBL11-1s_mat_ap1	Ap34		mat	1.79155	0.165339	0.403662	0.474956	0.141984	0.043163	52.2755	1.50277	41.1991	0.305543	0.576311	0	98.8799	2.21587	17.313	2.38958	4.55673	11.0517	71.8322	0.422331	0.848594	0.955176	8.72915	2.48453
RBL11-1s_M2_ap1_1	Ap35		mat	1.6845	0.085665	0.4205	0.99482	0.121652	0.062241	52.3853	1.42552	41.7907	0.237051	0.341152	0	99.5491	2.36326	30.1552	2.27387	2.68808	12.4509	49.9357	0.421518	0.873921	0.947352	10.5671	3.54067
RBL11-1s_M2_ap1_2			mat	1.58657	0.094293	0.410645	1.11103	0.07861	0.094597	52.3623	1.43734	40.3563	0.205555	0.359631	0	98.0968	2.47715	29.6149	2.32455	2.49604	20.1365	32.847	0.421535	0.868497	0.965522	12.3221	3.4078
RBL11-1s_M2_ap2_core	Ap36		mat	1.88815	0.105142	0.395738	0.537612	0.10443	0.124623	51.5712	1.48521	41.8444	0.267495	0.33564	0	98.6596	2.14215	25.2039	2.44256	4.08211	14.727	25.3993	0.42513	0.852352	0.94703	9.50094	3.58199
RBL11-1s_M2_ap2_rim			mat	1.75831	0.164228	0.422204	0.610452	0.142727	0.068268	52.6754	1.42315	40.988	0.447905	0.411206	4e-06	99.1118	2.27627	16.139	2.27665	3.64858	10.9138	47.3285	0.420537	0.875591	0.957951	6.90267	3.11685
RBL11-1s_mat_ap2_core	Ap37		mat	1.84037	0.137987	0.403153	0.498765	0.107023	0.04067	52.7915	1.45394	40.8518	0.218619	0.388843	4e-06	98.7326	2.18733	20.2555	2.38588	4.25411	14.7499	78.3856	0.419484	0.862218	0.957352	11.122	3.26053
RBL11-1s_mat_ap2_rim1			mat	1.84389	0.178159	0.410011	0.427904	0.136533	0.078987	52.836	1.41806	41.3392	0.280806	0.379636	0	99.3292	2.19856	16.1315	2.37291	4.93144	11.6267	40.3309	0.419587	0.87603	0.952377	9.57565	3.30418
RBL11-1s_mat_ap3	Ap38		mat	1.88355	0.170079	0.424372	0.509568	0.113171	0.024028	52.5501	1.47521	42.1292	0.342767	0.540459	0	100.163	2.14658	18.6697	2.29638	4.27714	13.3235	134.024	0.421647	0.858154	0.944663	7.73536	2.60383
RBL11-1s_mat_ap4	Ap39		mat	1.81628	0.123149	0.398657	0.470736	0.150193	0.162182	53.1892	1.44464	41.5116	0.302892	0.093176	4e-06	99.6627	2.22171	22.8142	2.4437	4.53408	10.6814	19.867	0.418834	0.867501	0.95307	9.01618	9.76804
RBL11-1s_mat_ap6	Ap40		mat	1.86841	0.111117	0.393556	0.463806	0.093452	0.152659	53.2523	1.45931	41.7531	0.202333	0.282718	1.1e-05	100.033	2.15414	25.5246	2.46092	4.65058	16.7849	20.826	0.418641	0.861749	0.950105	12.1654	4.08604
RBL11-3-4_pyx1_inc_ap1	Ap1	Effusive	pyx	1.83098	0.282043	0.478369	1.04357	0.150017	0.083694	53.1714	1.42366	40.9917	0.362954	0.653634	8e-06	100.472	2.19996	11.0161	2.11916	2.57361	10.4943	37.9066	0.418028	0.871226	0.957128	7.60193	2.26713
RBL11-3-4_mat_ap1	Ap2		mat	1.87246	0.126015	0.403088	0.588695	0.122578	0.088625	53.7885	1.48215	41.1877	0.279489	0.390616	0	100.33	2.15421	23.4931	2.41714	3.82814	12.9403	35.4405	0.415595	0.854401	0.954318	9.64603	3.19025
RBL11-3-4_mat_ap1_2			mat	1.84322	0.131291	0.412541	0.51979	0.157144	0.092153	53.6749	1.49622	42.7227	0.342385	0.504407	0	101.897	2.18833	21.9928	2.35466	4.26216	9.92719	35.1272	0.41645	0.850488	0.936751	8.05666	2.72103
RBL11-3-4_mat_ap1_3			mat	2.12969	0.246323	0.371457	0.920906	0.150137	0.05862	52.8037	1.35865	40.0968	2.30926	0.302856	0	100.748	1.96216	12.8137	2.59167	2.82392	10.8651	54.1076	0.419482	0.895208	0.971041	2.63023	3.84127
RBL11-3-4_mat_ap2_1	Ap3		mat	1.99308	0.162489	0.401376	0.583189	0.100361	0.031209	54.1029	1.42408	42.1871	0.377643	0.340478	0	101.704	2.05778	18.2249	2.41586	3.87305	15.7388	104.23	0.415162	0.874584	0.944191	7.43568	3.52324
RBL11-3-4_mat_ap2_2			mat	2.04171	0.087337	0.402211	0.685382	0.106841	0.077955	54.0525	1.43944	42.1199	0.272103	0.36089	0	101.646	2.04926	32.546	2.43889	3.46269	15.2257	39.8137	0.415167	0.869078	0.944653	9.56421	3.43679
RBL11-3-4_mat_ap2_3			mat	1.99325	0.139802	0.397683	0.556881	0.153199	0.086327	54.1153	1.46563	42.9659	0.274836	0.346408	-1e-05	102.495	2.08594	22.1029	2.47538	3.97116	10.4659	35.9558	0.41496	0.860352	0.934778	9.51655	3.47306
RBL11-3-4_mat_ap3_1	Ap4		mat	2.80665	0.180792	0.324796	1.71839	0.14163	0.080038	52.933	1.33744	42.5338	0.753299	0.368035	0	103.178	1.62135	16.2336	2.84942	1.89619	11.3136	38.4995	0.41925	0.906179	0.940416	4.93181	3.41071
RBL11-3-4_mat_ap3_2			mat	2.44467	0.089831	0.415767	0.640839	0.111903	0.116213	53.9617	1.07562	42.415	0.29276	0.330453	8e-06	101.895	1.78793	29.7714	2.35015	3.61359	14.1752	27.5778	0.415283	1.02027	0.941607	9.27291	3.60808
RBL11-3-4_mag1_ap1_1	Ap5		mat	1.82328	0.417786	0.423716	2.46858	0.124697	0.020286	52.046	1.3958	40.3502	0.37349	0.668715	0	100.113	2.20749	8.695	2.35385	1.51158	12.6078	154.705	0.422777	0.883353	0.96631	7.46125	2.26042
RBL11-3-4_mag1_ap1_2			mat	1.86873	0.459365	0.354734	2.32849	0.137819	0.057318	52.793	1.49982	41.477	0.278732	0.350226	0	101.605	2.17495	8.20301	2.65996	1.55949	11.2478	57.0604	0.419705	0.849559	0.952552	9.77318	3.55543
RBL11-3-4_attached_ap1	Ap6		mat	2.21381	0.170564	1.72667	3.15364	0.226167	0.064257	50.1403	1.43426	39.3191	3.05454	0.338083	4e-06	101.841	1.92704	16.853	0.904655	1.31592	7.52492	49.3328	0.430395	0.873138	0.98432	2.26962	3.59378
RBL11-3-4_attached_ap2	Ap7		mat	2.31814	0.135345	0.37425	1.37988	0.106153	0.058602	54	1.51233	42.737	0.270832	0.26278	0	103.155	1.85031	22.3752	2.59105	2.17961	14.6973	55.7909	0.41503	0.846046	0.937448	9.65271	4.25789
RBL11-3-4_attached_ap3	Ap8		mat	2.29472	0.168815	0.491864	4.31896	0.181627	0.051094	50.9048	1.2492	39.8679	1.31174	0.362154	4e-06	101.203	1.90293	17.6036	2.09179	1.09707	8.91754	60.8612	0.426847	0.938075	0.974292	3.59328	3.42888
RBL11-3-4_attached_ap4	Ap9		mat	2.63659	0.209698	0.378825	1.9125	0.138332	0.111054	51.6276	1.23686	40.4576	2.63111	0.337653	0	101.678	1.68878	14.9598	2.56145	1.76333	11.6214	28.9852	0.42445	0.946441	0.968086	2.44007	3.56963
RBL11-3-4_clust1_ap1	Ap10		pyx	2.11349	0.171689	0.460851	0.994688	0.135145	0.083748	53.6302	1.37224	42.6053	0.320195	0.350517	0	102.238	1.97096	16.453	2.17525	2.68009	11.7537	36.7127	0.41653	0.887724	0.939326	8.28735	3.49299
RBL11-3-4_clust1_ap2	Ap11		pyx	2.31466	0.141605	0.40936	0.976025	0.115605	0.055078	53.7457	1.34091	42.2627	0.308398	0.363611	4e-06	102.034	1.86546	20.2572	2.37834	2.71021	13.9735	59.1518	0.41623	0.903123	0.942756	8.69057	3.37722
RBL11-3-4_clust1_ap4_1	Ap12		pyx	1.87793	0.140363	0.451292	0.784182	0.114684	0.028757	53.9179	1.39994	41.402	0.277807	0.376822	0	100.772	2.19144	19.6319	2.21587	3.18376	13.7087	109.498	0.415409	0.881291	0.952817	9.06172	3.28083
RBL11-3-4_clust1_ap4_2			pyx	2.01221	0.083147	0.40925	0.869282	0.141683	0.075382	53.421	1.37368	41.5624	0.205606	0.286758	4e-06	100.44	2.03571	33.6556	2.39657	2.90785	11.0108	42.0327	0.417336	0.892641	0.949611	12.0489	4.05503
RBL11-3-4_clust1_ap5	Ap13		pyx	1.70572	0.210653	0.448929	0.642175	0.160938	0.096972	53.2759	1.47987	42.5593	0.31845	0.339847	0	101.239	2.31735	15.1603	2.19081	3.60431	9.90338	32.2743	0.418132	0.856054	0.939159	8.53156	3.55687
RBL11-3-4_clust1_ap6_1	Ap14		mat	1.93838	0.212416	0.418533	0.681221	0.135304	0.050315	54.0629	1.45597	41.6714	0.346093	0.459929	-1e-05	101.433	2.10154	13.786	2.33584	3.47077	11.656	63.1875	0.414789	0.861439	0.948735	7.85189	2.92341
RBL11-3-4_clust1_ap6_2			mat	1.98862	0.160858	0.414113	0.768321	0.157172	0.051482	53.6924	1.4624	39.8979	0.339291	0.461293	0	99.3939	2.0491	18.4272	2.37561	3.13793	10.0755	62.3764	0.415945	0.8618	0.970363	7.99822	2.87898
RBL11-3-4_clust1_ap8_1	Ap15		pyx	1.89377	0.145859	0.416442	0.653182	0.110412	0.046693	53.7174	1.50527	42.3724	0.279151	0.378178	0	101.519	2.13328	20.4413	2.3357	3.5864	13.9023	66.6419	0.416153	0.846933	0.940861	9.4567	3.33276
RBL11-3-4_clust1_ap8_2			pyx	1.88321	0.236435	0.429607	0.621485	0.138476	0.098171	53.3261	1.45467	42.1467	0.300178	0.418506	0	101.054	2.1615	12.6891	2.28648	3.73303	11.4343	32.1674	0.417547	0.864966	0.943038	8.76531	3.08686
RBL11-3-4_mat_ap4_rim	Ap16		mat	2.52423	0.148938	0.389095	0.791279	0.102954	0.022744	53.7016	1.06025	40.9467	0.340298	0.476273	0	100.504	1.75974	19.0381	2.48913	3.13231	14.657	139.609	0.415986	1.02389	0.958443	8.2902	2.78338
RBL11-3-4_mat_ap4_core1			mat	1.92947	0.179622	0.420023	0.604003	0.151695	0.062279	53.4749	1.38631	43.2142	0.387226	0.539134	0	102.349	2.11431	17.3421	2.34449	3.79643	10.5318	50.9742	0.417477	0.886742	0.933253	7.3826	2.5953
RBL11-3-4_mat_ap4_core2			mat	1.93793	0.114526	0.434181	0.637945	0.149321	0.028745	53.8093	1.40172	41.5302	0.284591	0.462269	4e-06	100.791	2.11971	25.8439	2.2892	3.64851	10.1723	104.955	0.41571	0.880399	0.950899	9.73421	2.85875
RBL11-3-4_mat_ap4_rim2			mat	2.02995	0.132103	0.405856	0.898045	0.13	0.087363	53.7395	1.2389	40.6882	0.415533	0.28943	8e-06	100.055	2.02627	20.9126	2.37862	2.8584	12.2548	35.8671	0.415989	0.940579	0.961199	7.09596	3.94155
RBL11-3-4_attached_ap5_core	Ap17		mat	2.12577	0.133662	0.418998	0.636232	0.137006	0.150832	53.8464	1.25189	39.944	0.327778	0.418779	4e-06	99.3914	1.99114	21.2307	2.36094	3.64234	11.4577	22.0238	0.415289	0.938684	0.970854	8.10846	3.04348
RBL11-3-4_attached_ap5_rim			mat	2.78814	0.152883	0.366234	0.81294	0.125765	0.081326	52.9792	1.26101	40.2401	1.53394	0.254362	0	100.596	1.62972	19.9967	2.62073	3.04058	12.3719	39.3669	0.418817	0.933786	0.967831	3.264	4.43194
RBL11-3-4_matrix_ap5_1	Ap18		mat	2.25746	0.084508	0.414749	0.817771	0.127618	0.031115	54.2403	1.2461	40.8157	0.349834	0.530135	4e-06	100.915	1.88823	33.896	2.3791	3.04653	12.5033	101.167	0.413772	0.936356	0.959009	7.98072	2.63276
RBL11-3-4_matrix_ap5_2			mat	2.1763	0.112812	0.392861	1.13917	0.125262	0.069366	53.9266	1.27092	40.3781	0.752804	0.297399	8e-06	100.642	1.94859	25.1597	2.48603	2.44696	12.6437	44.101	0.414943	0.929849	0.965808	4.73012	3.87296
RBL11-3-4_attached_ap6	Ap19		mat	2.48488	0.091992	0.376734	0.477199	0.126772	0.040704	53.7362	1.30504	41.8602	0.267501	0.29013	0	101.057	1.76963	29.7119	2.54706	4.5745	12.5526	74.192	0.415971	0.91396	0.946325	9.21475	3.91376
RBL11-3-4_attached_ap7	Ap20		mat	1.81813	0.206222	0.441469	0.759701	0.135183	0.079018	53.8423	1.56653	40.7344	0.272575	0.46791	0	100.323	2.22331	14.1595	2.22896	3.17403	11.7684	39.7444	0.415467	0.829364	0.960878	9.00109	2.82007
RBL11-3-4_attached_ap8	Ap21		mat	1.98563	0.128921	0.40644	0.65713	0.131476	0.035926	53.9487	1.4149	41.2754	0.320314	0.38474	0	100.69	2.05679	23.0286	2.41434	3.58563	12.1716	89.1156	0.41527	0.876566	0.953916	8.44933	3.26423
RBL11-3-4_clust2_mat_ap6_rim	Ap22		mat	2.49824	0.024816	0.352173	0.786738	0.131434	0.043087	54.1603	1.25406	41.835	0.265994	0.254864	0	101.607	1.75311	112.539	2.72375	3.10399	11.7468	73.3153	0.414478	0.936627	0.947511	9.71046	4.35087
RBL11-3-4_clust2_mat_ap6_2			mat	1.99322	0.144398	0.415376	0.558027	0.145826	0.138775	53.8741	1.41144	41.6433	0.309986	0.343621	8e-06	100.978	2.07546	19.288	2.37748	3.96945	10.8625	22.4534	0.415305	0.874767	0.94923	8.55481	3.51687
RBL11-3-4_clust2_mat_ap6_core			mat	1.83483	0.200474	0.392263	0.56695	0.126252	-0.02037	54.021	1.54839	40.6072	0.390357	0.543884	4e-06	100.211	2.19004	14.8492	2.49551	3.96532	12.5272	-153.02	0.414696	0.83443	0.96066	7.3326	2.5764
RBL11-3-4_clust2_mat_ap6_rim2			mat	2.29657	0.120321	0.405493	0.744367	0.075677	0.03227	54.2377	1.17773	41.309	0.347414	0.353342	0	101.1	1.85339	23.9175	2.41577	3.25908	20.5036	96.8962	0.413936	0.967714	0.95286	8.00225	3.45969
RBL11-3-4_clust2_mat_ap7_1	Ap23		mat	2.25954	0.093672	0.443423	0.625099	0.134555	0.069358	54.3004	1.17579	40.7743	0.293215	0.478265	4e-06	100.648	1.88648	31.5516	2.25891	3.68593	11.5386	46.0848	0.413323	0.970532	0.958952	8.93132	2.80568
RBL11-3-4_clust2_mat_ap7_2			mat	2.21108	0.129174	0.404124	0.630569	0.132683	0.064575	53.7724	1.19472	40.416	0.290967	0.464333	8e-06	99.7106	1.91593	22.2355	2.4248	3.71434	11.8671	49.3489	0.415396	0.962962	0.963326	8.96268	2.87082
RBL11-3-4_clust2_mat_ap8_1	Ap24		mat	1.91973	0.152169	0.403074	0.578699	0.148036	0.113554	53.9985	1.50758	41.7984	0.234033	0.347121	0	101.201	2.13875	19.4229	2.42133	3.89639	10.8844	27.5293	0.414899	0.847443	0.946864	10.8631	3.46881
RBL11-3-4_clust2_mat_ap8_2			mat	1.92287	0.139645	0.410792	0.548361	0.139207	0.068167	54.068	1.49631	41.0087	0.275913	0.334943	0	100.413	2.13162	20.9356	2.39019	4.04447	11.4374	47.1047	0.414308	0.849732	0.955625	9.81745	3.60207
RBL11-3-4_clust2_mat_ap9_1	Ap25		mat	2.55121	0.12596	0.409063	0.743053	0.132903	0.058474	54.0327	1.21072	42.0193	0.289234	0.31399	0	101.887	1.73026	23.2246	2.40227	3.24075	11.8121	53.3417	0.414207	0.95136	0.944252	9.18119	3.73489
RBL11-3-4_clust2_mat_ap9_2			mat	2.64725	0.146327	0.380674	0.829695	0.103466	0.066776	53.8223	1.2746	41.4297	0.34681	0.290048	8e-06	101.338	1.69283	19.5631	2.51406	3.01188	15.1009	46.8452	0.414773	0.92513	0.950516	8.0442	3.93791
RBL11-3-4_mat_ap10_rim1	Ap26		mat	2.10749	0.184637	0.418494	0.67872	0.117178	0.062113	53.4223	1.40635	42.6889	0.28587	0.472858	0	101.845	1.96715	15.5028	2.36143	3.47357	13.4988	50.1005	0.417136	0.879339	0.935451	9.06548	2.87688
RBL11-3-4_mat_ap10_core			mat	2.06752	0.082605	0.425203	0.529974	0.14004	0.118278	53.9526	1.43728	42.1062	0.260821	0.488929	0	101.609	2.00127	35.3802	2.31167	4.23692	11.6073	27.1682	0.41488	0.868661	0.942798	10.0144	2.73059
RBL11-3-4_mat_ap10_core2			mat	2.13465	0.231808	0.492109	1.96454	0.133265	0.01667	52.485	1.41448	39.9562	0.808475	0.459068	4e-06	100.096	1.95594	13.6888	2.06599	1.74429	12.0116	186.128	0.420086	0.878517	0.970246	4.74071	2.87595
RBL11-3-4_mat_ap10_rim2			mat	2.22969	0.750497	0.340662	1.5654	0.122544	0.076089	46.7472	1.29529	38.0122	8.49905	0.309209	0	99.9479	1.87871	5.69803	2.75435	1.96972	12.3915	42.7624	0.446569	0.925832	1.00678	1.32664	3.86083
RBL11-3-4_mat_ap11_rim1	Ap27		mat	1.92604	0.126049	0.410907	0.557213	0.155331	-0.03466	54.3134	1.42097	40.4608	0.33185	0.348892	8e-06	100.017	2.10526	23.1289	2.38099	4.04768	10.2329	-92.194	0.412905	0.872793	0.960776	8.2828	3.44968
RBL11-3-4_mat_ap11_core1			mat	1.74462	0.126013	0.385533	0.533258	0.114769	0.050155	53.6643	1.45453	41.7947	0.290635	0.44978	0	100.608	2.26887	23.991	2.51159	4.13195	13.8469	62.2867	0.415713	0.865144	0.945428	8.90583	2.90566
RBL11-3-4_mat_ap11_core2			mat	1.83096	0.17217	0.408116	0.55472	0.152092	0.053737	53.5463	1.50158	40.697	0.312659	0.43883	0	99.6681	2.19974	15.5419	2.39283	3.97079	10.5357	60.4973	0.416091	0.846085	0.958142	8.35199	3.00024
RBL11-3-4_mat_ap11_rim2			mat	1.88776	0.155968	0.393775	0.932893	0.141652	0.07751	53.2047	1.4366	40.4418	0.32941	0.382332	0	99.3844	2.15263	19.744	2.44705	2.79327	11.191	40.6461	0.417541	0.867693	0.962518	8.1143	3.32694
RBL11-3-4_mat_attached_ap9	Ap28		mat	1.98444	0.24129	0.44529	1.06063	0.161562	0.077442	53.1813	1.51784	39.347	0.410007	0.698116	-1e-05	99.1249	2.06569	13.611	2.23513	2.56392	9.84609	40.6878	0.417134	0.841156	0.975113	7.14173	2.16257
RBL11-3-4_mat_ap12_core	Ap29		mat	1.9314	0.130919	0.418491	0.639083	0.105785	0.09541	53.7617	1.45284	41.994	0.298729	0.395113	0	101.224	2.11187	22.3975	2.33985	3.55524	14.4453	32.3633	0.415141	0.861945	0.943356	8.80482	3.17628
RBL11-3-4_mat_ap12_rim			mat	2.18755	0.13514	0.431493	0.868349	0.144428	0.123989	53.3631	1.41688	40.6667	0.328086	0.348256	8e-06	100.014	1.90961	20.7476	2.33055	2.8963	11.0836	25.449	0.416762	0.873941	0.96004	8.42158	3.47696
RBL11-3-3_pyx_ap1_1	Apa30		pyx	1.85737	0.235822	0.698362	1.73844	0.237325	0.142096	50.6758	1.49916	41.4196	0.328852	0.427646	0	99.2604	1.7535	9.87296	1.83745	1.89648	7.38936	22.2415	0.43035	0.688734	0.988192	8.59949	4.36637
RBL11-3-3_pyx_ap1_2			pyx	1.62006	0.177154	0.536349	1.73127	0.180935	0.050732	52.1328	1.74849	41.4036	0.494941	0.503963	0	100.58	1.95653	12.7771	2.23049	1.89635	8.96282	63.1732	0.422829	0.630654	0.984797	6.31649	3.86817
RBL11-3-3_pyx_ap2_1	Apa31		pyx	1.69128	0.243715	0.390642	0.61034	0.12572	0.099323	52.4851	1.50912	41.2697	0.341298	0.608051	0	99.3743	1.89105	9.52012	2.78562	3.7205	12.5747	33.5829	0.421692	0.684079	0.986734	8.70103	3.4372
RBL11-3-3_pyx_ap2_2			pyx	1.70775	0.196065	0.405147	0.529552	0.133292	0.071481	52.2495	1.48314	41.5717	0.39099	0.404306	-1e-05	99.1429	1.87098	11.8607	2.74406	4.29739	11.544	43.7866	0.422828	0.689588	0.982937	7.59195	4.50276
RBL11-3-3_pyx_ap3_1	Apa32		pyx	1.81473	0.126282	0.420997	0.822471	0.141142	0.04113	52.3085	1.47678	41.9242	0.252259	0.461439	4e-06	99.7899	1.76698	17.2588	2.64513	3.04264	11.3536	76.3867	0.422245	0.692588	0.978606	10.0685	4.17289
RBL11-3-3_pyx_ap3_2			pyx	1.77257	0.146707	0.396428	0.832459	0.103038	0.03873	53.2813	1.49107	41.9637	0.263193	0.470889	4e-06	100.76	1.82494	15.0769	2.7807	3.0628	15.1434	80.5606	0.418549	0.687035	0.977579	10.0982	4.02266
RBL11-3-3_pyr_ap4	Apa33		pyx	1.72085	0.229419	0.470623	0.786334	0.17117	0.056852	52.5796	1.41484	40.8997	0.423816	0.544933	0	99.2981	1.86567	10.3278	2.42046	3.15965	9.50677	56.0829	0.421005	0.70587	0.990721	7.27767	3.66968
RBL11-3-3_pyr_ap6	Apa34		pyx	1.6033	0.16644	0.381667	0.947321	0.153351	0.076234	53.2818	1.50488	41.197	0.330427	0.464099	8e-06	100.107	1.97253	13.0421	2.90163	2.80352	10.3844	41.6084	0.418266	0.683923	0.986646	8.64661	4.05734
RBL11-3-3_pyr_ap7	Apa35		pyx	1.82196	0.19356	0.468361	0.971559	0.1652	0.121093	54.7141	1.4292	40.616	0.457797	0.539122	0	101.498	1.77366	11.6107	2.43887	2.73838	9.84	25.9619	0.412701	0.701144	0.994435	6.69667	3.72564
RBL11-3-3_pyr_ap8	Apa36		pyx	1.87972	0.215215	0.406295	1.26189	0.128883	0.075021	53.8927	1.42577	40.3612	0.265599	0.522819	0	100.435	1.71975	10.5842	2.75134	2.30253	12.6492	42.2942	0.415486	0.702642	0.997077	10.0144	3.78569
RBL11-3-3_pyr_ap9	Apa37		pyx	1.8395	0.359122	0.714181	1.41193	0.165612	0.035079	53.1772	1.42727	39.8731	1.54196	0.518646	0	101.064	1.74425	7.02483	1.79042	2.12358	9.60269	91.0683	0.418734	0.703944	1.00584	3.40908	3.83917
RBL11-3-3_pyx_ap12_2	Apa38		pyx	1.79593	0.120203	0.375483	0.834306	0.127579	0.070261	54.3162	1.51873	40.7659	0.240248	0.456717	0	100.622	1.81607	17.9974	2.90205	3.05988	12.4421	45.2922	0.414281	0.679902	0.991642	10.3489	4.10884
RBL11-3-3_pyx_ap13	Apa39		pyx	1.64321	0.210646	0.418607	0.804225	0.142683	0.077546	53.8839	1.5113	40.9894	0.299592	0.493373	0	100.475	1.92653	10.9418	2.63587	3.13484	11.1381	39.7146	0.416039	0.680751	0.989711	9.31714	3.92728
RBL11-3-3_pyx_ap15	Apa40		pyx	2.06783	0.195699	1.01106	1.67538	0.159139	0.059291	52.9181	1.47379	39.717	1.44561	0.656479	0	101.379	1.60999	11.9045	1.40233	1.92106	10.7849	52.8517	0.419791	0.692555	1.00822	3.51183	3.24199
RBL11-3-3_pyx_ap16	Apa41		pyx	1.84337	0.221294	0.397853	0.763671	0.147128	0.114044	54.3156	1.40815	41.2636	0.376735	0.576393	0	101.428	1.78722	10.533	2.76641	3.23353	10.8132	27.5412	0.414729	0.709052	0.986301	7.75253	3.51733
RBL11-3-3_pyx_ap17	Apa42		pyx	2.14822	0.151867	0.384996	0.845841	0.130018	0.084847	54.9027	1.75212	40.6878	0.398387	0.434054	1.1e-05	101.921	1.57347	14.6572	2.85826	3.02447	12.5487	37.2514	0.41202	0.629642	0.993737	7.61309	4.27622
RBL11-3-1_pyx1_ap1	Apa43		pyx	1.95486	0.128492	0.418022	0.54212	0.133973	0.050929	54.0589	1.33975	41.435	0.289394	0.42482	0	100.776	2.02994	22.8797	2.36888	4.0712	11.8258	62.8325	0.394537	0.945541	0.996627	9.92127	3.24034
RBL11-3-1_pyx1_ap2	Apa44		pyx	1.64795	0.147516	0.402372	0.554749	0.138264	0.114007	53.3053	1.46068	42.9468	0.291818	0.330703	0	101.34	2.30604	20.6309	2.47308	4.08329	11.6883	28.1068	0.397663	0.90583	0.979168	9.93538	3.91195
RBL11-3-1_pyx1_ap3	Apa45		pyx	1.87924	0.232835	0.397349	0.601916	0.150888	0.037588	53.9613	1.46706	40.4328	0.348353	0.656403	0	100.166	2.08415	13.7058	2.51249	3.80985	10.8079	85.898	0.394676	0.902319	1.00965	8.39001	2.43004
RBL11-3-1_pyx1_ap5	Apa46		pyx	1.59291	0.062929	0.41064	0.663665	0.134844	0.041207	53.546	1.51004	42.4023	0.292536	0.399348	0	101.057	2.34408	46.3327	2.41875	3.5684	11.4641	77.0057	0.396262	0.88683	0.984019	9.92033	3.41473
RBL11-3-1_pyx1_ap6	Apa47		pyx	1.68513	0.160996	0.419561	0.572427	0.148152	0.042454	53.4881	1.50548	40.6518	0.331336	0.386223	4e-06	99.3917	2.25208	19.0377	2.40685	3.91163	10.733	75.4438	0.396523	0.885781	1.00711	8.93468	3.51928
RBL11-3-1_pyx1_ap7	Apa48		pyx	1.74901	0.11127	0.385857	0.65677	0.139615	0.115152	53.3632	1.4792	43.271	0.301039	0.402129	0	101.974	2.16737	26.9177	2.52551	3.5807	11.5394	27.6969	0.397248	0.896019	0.974954	9.72416	3.38186
RBL11-3-2_pyx1_ap1	Apa49		pyx	2.09316	0.133412	0.461928	0.939045	0.171929	0.033989	53.9183	1.38193	40.0989	0.415685	0.523851	0	100.172	1.9172	21.8676	2.19846	2.80563	9.40941	92.5178	0.395377	0.935447	1.01538	7.54923	2.82876
RBL11-3-2_pyx1_ap2_1	Apa50		pyx	1.86936	0.243047	0.475934	1.17979	0.168901	0.104271	53.816	1.50746	40.932	0.316078	0.419972	0	101.033	2.04474	12.8758	2.15774	2.40743	9.75639	31.1157	0.395376	0.888493	1.00405	9.45388	3.23223
RBL11-3-2_pyx1_ap2_2			pyx	1.95274	0.237113	0.473374	1.27308	0.189591	0.095724	53.3387	1.4622	40.514	0.365558	0.405538	-1e-05	100.308	2.00565	14.0636	2.16518	2.26279	8.5543	33.2414	0.397333	0.903249	1.0091	8.89185	3.39557
RBL11-3-2_pyx1_ap3_1	Apa51		pyx	1.83231	0.204263	0.418193	0.961146	0.167111	0.089796	53.9859	1.53294	40.8298	0.276525	0.433404	0	100.731	2.10702	15.1043	2.41765	2.77661	9.65772	36.5269	0.395094	0.88183	1.00726	10.1718	3.22132
RBL11-3-2_pyx1_ap3_2			pyx	1.8973	0.188962	0.438465	0.932657	0.174536	0.093336	53.4231	1.5454	42.2543	0.286391	0.42651	-1e-05	101.661	2.05649	15.4835	2.31266	2.79002	9.50238	33.9446	0.397125	0.876042	0.987975	10.2044	3.2479
RBL11-3-2_pyx2_ap1	Apa52		pyx	1.78205	0.21004	0.420278	0.570387	0.138309	0.110454	54.2689	1.52146	41.045	0.354713	0.462519	0	100.884	2.15407	14.5314	2.39382	3.93188	11.4769	29.0522	0.393756	0.881994	1.00203	8.25231	3.0456
RBL11-3-2_pyx3_ap1	Apa53		pyx	2.0037	0.174358	0.477547	0.945849	0.141919	0.102993	54.0376	1.70403	41.5805	0.306105	0.359267	0	101.834	1.95961	17.8837	2.18814	2.78364	11.407	30.5707	0.394621	0.830161	0.996409	9.64395	3.65757
RBL11-3-2_pyx3_ap2	Apa54		pyx	1.92454	0.166806	0.513755	1.88286	0.155475	0.090737	53.0368	1.35762	41.5586	0.329609	0.43219	0	101.449	2.02612	17.2467	2.05276	1.7936	10.5616	35.7178	0.398397	0.939554	0.997078	9.13012	3.25767
RBL11-3-2_pyx5_ap2	Apa55		pyx	1.71993	0.040582	0.404063	0.6545	0.133543	0.054576	53.8019	1.4533	42.7767	0.235319	0.07915	0	101.354	2.20037	68.478	2.45959	3.6026	12.0399	60.0966	0.395758	0.908979	0.981512	11.868	12.6453
RBL11-3-2_pyx5_ap3	Apa56		pyx	1.73547	0.277475	0.613155	1.05545	0.181163	0.096973	52.8385	1.60789	40.8696	0.994445	0.434747	4e-06	100.705	2.18714	12.0773	1.79716	2.61338	8.73884	31.7747	0.39943	0.858695	1.00651	4.49404	3.19472
RBL11-3-2_pyx5_ap4	Apa57		pyx	1.75651	0.209402	0.620201	1.12313	0.172229	0.095802	53.2604	1.52429	39.7266	0.608835	0.523127	0	99.6205	2.19728	15.2232	1.78654	2.44921	9.68089	32.3452	0.397592	0.882303	1.01987	6.14069	2.85833
RBL11-4-1-clust7_ap1	Ap1	Vulcanian	mat	1.75249	0.108825	0.417964	0.622543	0.101896	0.119635	53.4373	1.4579	39.6414	0.407891	0.412398	0	98.4802	1.81096	26.152	2.43772	3.65993	15.6776	25.9923	0.416314	0.858488	0.999681	7.034	3.15006
RBL11-4-1-clust7_ap2	Ap2		mat	1.84155	0.063943	0.425795	0.680373	0.110818	0.078201	52.719	1.44242	39.0458	0.261067	0.391796	0	97.0608	1.74701	46.7955	2.42025	3.44018	13.9377	40.5518	0.419166	0.865634	1.00674	9.88863	3.26525
RBL11-4-1-clust7_ap3	Ap3		mat	1.86965	0.074811	0.414976	0.512195	0.118336	0.079429	53.1732	1.45587	38.7219	0.247581	0.292506	0	96.9604	1.72603	40.444	2.43982	4.22675	13.2699	40.0864	0.417276	0.858894	1.01254	10.0148	4.07517
RBL11-4-1-clust7_ap4	Ap4		mat	1.73596	0.166311	0.44853	0.523919	0.110389	0.055713	53.0618	1.52602	39.0567	0.454529	0.613129	0	97.753	1.83338	18.9214	2.2866	4.10539	14.4197	55.2901	0.418047	0.837053	1.00798	6.91542	2.42872
RBL11-4-1-clust7_ap6	Ap5		mat	1.79453	0.153619	0.42114	0.676342	0.107123	0.088892	52.4513	1.48104	39.0683	0.531402	0.397841	8e-06	97.1715	1.76765	19.2254	2.43163	3.4247	14.6992	35.5604	0.420397	0.84926	1.00844	6.18936	3.26973
RBL11-4-1-clust7_ap8	Ap6		mat	1.81549	0.128026	0.412588	0.557942	0.112834	0.053397	53.3015	1.51077	39.2205	0.198207	0.388682	0	97.6999	1.75211	24.1892	2.48234	3.96861	13.828	58.1594	0.416857	0.842789	1.00586	12.6295	3.24826
RBL11-4-1-clust7_ap9	Ap7		mat	1.83847	0.119741	0.405902	0.532806	0.131973	0.096072	53.7274	1.49307	39.4203	0.288254	0.498761	-1e-05	98.5527	1.76166	24.9548	2.53241	4.05179	12.0187	31.803	0.415484	0.847314	1.00367	9.49315	2.78228
RBL11-4-1-clust7_ap11	Ap8		mat	1.77582	0.11906	0.404367	0.594489	0.140962	0.089009	53.0158	1.45392	39.2021	0.26594	0.256748	0	97.3182	1.79635	23.9434	2.50407	3.73529	11.3012	34.9554	0.418248	0.858831	1.00677	10.0282	4.50852
RBL11-4-1-clust7_ap13	Ap9		pyx	1.75362	0.160833	0.427912	0.645895	0.147525	0.083066	53.3335	1.47335	40.0041	0.267442	0.331763	0	98.629	1.82708	18.9035	2.40324	3.58049	10.6334	37.4926	0.417081	0.853412	0.996615	9.66983	3.71138
RBL11-4-1-clust7_ap14	Ap10		mat	1.80443	0.156526	0.434933	1.06596	0.15128	0.046271	53.53	1.46102	39.4423	0.267939	0.360882	4e-06	98.7216	1.77514	19.4991	2.36149	2.5196	10.5521	68.7906	0.416307	0.857386	1.00436	9.43725	3.44652
RBL11-4-1-clust7_ap15	Ap11		pyx	1.81016	0.133614	0.431806	0.740923	0.145722	0.102094	53.2124	1.44357	40.1587	0.315799	0.354615	0	98.8494	1.77092	22.0966	2.39977	3.23562	10.7778	31.427	0.417912	0.865018	0.994814	8.52059	3.54354
RBL11-4-1-clust7_ap16	Ap12		mat	1.83654	0.140601	0.429606	0.488048	0.114864	0.099807	53.5276	1.49702	39.8698	0.294677	0.491943	0	98.7905	1.76395	22.2051	2.37542	4.41947	13.6059	31.0033	0.416619	0.847009	0.998132	9.43655	2.82785
RBL11-4-1-clust7_ap17	Ap13		mat	1.78304	0.164356	0.441907	0.533306	0.117216	0.03563	53.1735	1.49885	40.0964	0.278028	0.554342	0	98.6766	1.79832	19.0456	2.33576	4.07134	13.4975	87.2458	0.418211	0.845685	0.996186	9.44309	2.62623
RBL11-4-1-clust7_ap17_2			mat	1.76688	0.210624	0.42491	0.491293	0.162597	0.075999	53.2411	1.51175	39.7711	0.250961	0.44504	0	98.3522	1.80908	15.8074	2.40642	4.34435	9.7643	41.4206	0.417704	0.842364	0.999626	10.2194	2.99284
RBL11-4-1-clust7_ap18	Ap14		pyx	1.80541	0.204083	0.461344	0.937173	0.144722	0.083046	53.3969	1.5156	40.1964	0.317433	0.529037	4e-06	99.5911	1.76439	15.2213	2.25935	2.7258	11.0279	37.4255	0.416892	0.840401	0.994125	8.75275	2.72179
RBL11-4-1-clust7_ap20	Ap15		pyx	1.8021	0.193754	0.472986	1.45202	0.128531	0.036821	53.0599	1.47683	40.8153	0.362035	0.423805	0	100.224	1.79521	16.4196	2.21725	2.08702	12.5358	86.1338	0.418557	0.854931	0.988621	8.07893	3.10734
RBL11-4-1-clust7_ap21	Ap16		pyx	1.80369	0.134416	0.414106	0.999332	0.11993	0.06408	52.4677	1.47236	39.6897	0.356537	0.430764	4e-06	97.9527	1.77292	22.9146	2.44864	2.65939	12.9913	49.2825	0.420562	0.857082	1.00068	7.97281	3.07174
RBL11-4-1-clust7_ap23	Ap17		pyx	1.80281	0.229543	0.405921	0.451614	0.131883	0.072538	53.4149	1.44785	40.2616	0.613836	0.43857	0	99.2711	1.78328	13.9689	2.47801	4.71443	12.3529	44.2087	0.417225	0.861162	0.994098	5.42544	3.01907
RBL11-4-1-clust7_ap24	Ap18		mat	1.75843	0.158902	0.411745	0.512783	0.161873	0.091536	53.616	1.48188	40.7671	0.266216	0.31828	8e-06	99.5447	1.82119	18.5829	2.46632	4.25828	9.92786	34.7358	0.41641	0.854189	0.987569	9.86772	3.84531
RBL11-4-1-clust2_ap25	Ap19		mat	1.81416	0.150325	0.433583	0.548065	0.134631	0.03565	53.4037	1.44409	40.583	0.278156	0.290578	8e-06	99.116	1.76339	20.8251	2.34937	4.04086	11.6464	88.3629	0.417244	0.864039	0.98946	9.59505	4.15551
RBL11-4-1-clust2_ap28	Ap20		mat	1.78434	0.158498	0.429096	0.531042	0.116345	0.116483	53.3037	1.49253	41.4386	0.335257	0.368142	0	100.074	1.7993	19.6562	2.35639	4.12016	13.6446	26.7	0.417959	0.852028	0.980792	8.35744	3.47897
RBL11-4-1-clust2_ap28_2			mat	1.76004	0.15377	0.429859	0.646771	0.143625	0.033291	53.1288	1.51303	40.2765	0.281403	0.513219	0	98.8803	1.81523	19.2212	2.36669	3.52569	11.0846	94.2715	0.418418	0.841623	0.994338	9.31067	2.71179
RBL11-4-1-clust2_ap29	Ap21		mat	1.79334	0.190512	0.42627	0.945635	0.137825	0.079568	53.4475	1.49796	40.0458	0.590223	0.416883	0	99.5715	1.79169	16.817	2.41146	2.73869	11.2317	39.0165	0.41705	0.845549	0.997333	5.75093	3.17165
RBL11-4-1-mat_ap3_1	Ap22		mat	1.77784	0.127784	0.410221	0.530219	0.131811	0.067752	53.2395	1.57789	40.3715	0.243534	0.358417	0	98.8365	1.7947	23.6196	2.45677	4.1527	11.8426	48.2207	0.418051	0.82325	0.991969	10.3314	3.47008
RBL11-4-1-mat_ap3_2			mat	1.82795	0.145715	0.413454	0.596273	0.144072	0.026159	52.7783	1.51384	39.4728	0.297949	0.489671	4e-06	97.7061	1.75406	21.588	2.463	3.7505	11.0606	116.27	0.419655	0.841982	1.00508	8.97829	2.80578
RBL11-4-1-mat_ap3_3			mat	1.9287	0.169878	0.407121	0.522961	0.145044	0.074923	53.2566	1.51174	40.4504	0.311518	0.489781	0	99.2687	1.69902	18.034	2.48761	4.07477	11.2086	41.378	0.417847	0.842501	0.992688	8.41142	2.85467
RBL11-4-1-mat_ap3_ap30	Ap23		mat	1.79608	0.08285	0.43233	0.807115	0.111622	0.093825	51.4194	1.4865	41.7085	0.267512	0.213171	4e-06	98.4189	1.7919	31.5845	2.37092	3.01348	14.1386	32.7469	0.425518	0.853154	0.976499	9.69974	5.11226
RBL11-4-1_clust1_ap31	Ap24		mat	1.788	0.126839	0.416977	0.492565	0.125864	0.00594	53.4809	1.49746	41.0102	0.248148	0.492495	0	99.6854	1.79768	24.0926	2.44796	4.42823	12.5093	515.091	0.417145	0.84781	0.984543	10.8922	2.82381
RBL11-4-1_clust1_ap32	Ap25		pyx	1.83822	0.138177	0.434443	0.630586	0.140806	0.149776	51.858	1.52933	41.2004	0.331017	0.470177	0	98.721	1.74873	22.1658	2.3614	3.60679	11.1877	21.5961	0.423869	0.838711	0.983117	8.05649	2.90132
RBL11-4-1_clust1_ap33	Ap26		pyx	1.82457	0.20839	0.460609	0.965944	0.152005	0.111669	52.4083	1.53573	40.7707	0.497146	0.593656	-1e-05	99.5287	1.76122	15.0525	2.24399	2.71465	10.5398	28.3523	0.42154	0.838235	0.988822	6.40015	2.47673
RBL11-4-1_clust1_ap34	Ap27		pyx	1.83212	0.199351	0.460523	0.684214	0.12909	0.065405	52.3571	1.49621	40.0736	0.405063	0.660187	0	98.3628	1.75531	15.8667	2.27568	3.44078	12.173	46.6694	0.421537	0.847975	0.996491	7.46181	2.32567
RBL11-4-1_clust1_ap36	Ap28		pyx	1.83819	0.121152	0.409003	0.649466	0.129616	0.059471	52.187	1.45026	40.9079	0.305496	0.348436	4e-06	98.406	1.75583	25.7764	2.46909	3.60017	12.3281	55.1427	0.422416	0.864217	0.986384	8.6866	3.59953
RBL11-4-1_clust1_ap37	Ap29		mat	1.78286	0.11842	0.426883	0.591729	0.131024	0.10232	53.0141	1.5064	40.6578	0.397446	0.487611	4e-06	99.2166	1.80951	25.1189	2.40673	3.80069	12.2591	29.9771	0.419095	0.845483	0.99009	7.52171	2.83131
RBL11-4-1_clust1_ap39	Ap30		mat	1.74604	0.181609	0.428976	0.615819	0.112196	0.093955	52.9441	1.48561	40.7509	0.350669	0.538763	0	99.2486	1.82692	17.0372	2.38811	3.69997	13.6581	33.9066	0.419361	0.847996	0.988443	8.13421	2.64606
RBL11-4-1_clust1_ap38	Ap31		mat	1.85312	0.111036	0.410117	0.591049	0.137583	0.053513	52.4769	1.4533	41.2042	0.2467	0.38326	4e-06	98.9208	1.74328	27.1845	2.46853	3.83343	11.3878	59.0336	0.421366	0.863127	0.981868	10.7376	3.3243
RBL11-4-1_clust1_ap40	Ap32		pyx	1.89952	0.167695	0.434205	0.854276	0.140855	0.065397	52.8001	1.40535	40.5428	0.421934	0.629456	0	99.3616	1.71648	18.7334	2.37463	2.91956	11.4428	49.044	0.419788	0.8785	0.991573	6.87128	2.37876
RBL11-4-1_clust8_ap42	Ap33		mat	1.85506	0.083284	0.425293	0.473539	0.134703	0.033283	52.2706	1.47282	41.089	0.247931	0.297148	0	98.3826	1.74982	34.3838	2.37147	4.54678	11.6661	93.7176	0.422039	0.854305	0.983541	10.232	3.94357
RBL11-4-1_clust8_ap42_2			mat	1.76964	0.158021	0.419052	0.525054	0.118346	0.077351	54.0227	1.47678	41.4284	0.222725	0.25775	-1e-05	100.476	1.79854	20.1306	2.43274	4.12501	13.1756	40.6274	0.415151	0.852298	0.979505	10.8971	4.55175
RBL11-4-1_clust8_ap43	Ap34		mat	1.79137	0.106713	0.440856	0.61065	0.129642	0.085667	52.8888	1.46746	40.7801	0.733225	0.422464	4e-06	99.4569	1.78117	27.2932	2.31279	3.68355	12.2141	35.9629	0.419671	0.85961	0.989616	5.09334	3.09949
RBL11-4-1_clust8_ap44	Ap35		mat	1.76036	0.158456	0.43562	0.451704	0.119736	0.104678	52.2302	1.49457	40.9697	0.27373	0.50859	1.1e-05	98.5073	1.82847	18.9224	2.35376	4.73067	13.297	29.6888	0.422346	0.851221	0.985085	9.61491	2.78355
RBL11-4-1_clust8_ap45	Ap36		mat	1.78085	0.09985	0.44475	0.526046	0.126759	0.071369	52.9009	1.52055	40.8905	0.321867	0.536732	4e-06	99.2201	1.80569	28.2085	2.28623	4.19703	12.3979	43.6656	0.419514	0.84056	0.9863	8.61874	2.65523
RBL11-4-1_clust8_ap46	Ap37		mat	1.72508	0.117259	0.418462	0.521668	0.147041	0.071392	52.2921	1.47551	41.8838	0.240624	0.297048	4e-06	99.19	1.84706	25.4661	2.40974	4.18975	10.6846	44.7167	0.422015	0.854146	0.974938	10.0366	3.99133
RBL11-4-1_clust8_ap47	Ap38		mat	1.80136	0.158973	0.432763	0.694759	0.119285	0.041631	51.8445	1.48708	41.0082	0.258838	0.399917	0	98.2473	1.76206	19.2786	2.34165	3.44086	13.1071	73.1447	0.423953	0.852218	0.986069	9.86851	3.21359
RBL11-4-1_clust8_ap47_2			mat	1.86665	0.100207	0.420525	0.545814	0.144246	0.089275	53.2113	1.48135	40.9053	0.340339	0.428926	4e-06	99.5339	1.72227	29.3583	2.42728	4.09446	11.0112	35.5543	0.418293	0.854215	0.98672	7.81505	3.11068
RBL11-4-1_clust8_ap48	Ap39		mat	1.80853	0.111956	0.42785	0.521978	0.143273	0.049971	52.7656	1.50942	41.0531	0.249772	0.311079	0	98.9525	1.78434	25.6464	2.368	4.18938	11.0429	60.6164	0.419966	0.843794	0.984885	10.6041	3.80285
RBL11-4-1_clust8_ap49	Ap40		pyx	1.76762	0.185075	0.477589	0.729984	0.15554	0.088096	53.2017	1.53728	40.4971	0.482513	0.541373	8e-06	99.6639	1.81798	17.444	2.19925	3.28576	10.2151	34.7739	0.41857	0.835886	0.993007	6.57089	2.62629
RBL11-4-1_clust8_ap50	Ap41		pyx	1.86597	0.121599	0.42113	0.569322	0.133412	0.021417	52.43	1.49563	41.0503	0.365601	0.561839	0	99.0362	1.73723	24.0405	2.41127	3.94149	11.9935	149.941	0.421506	0.848316	0.984194	7.57785	2.57515
RBL11-4-1_clust8_ap51	Ap42		mat	1.75655	0.147188	0.431689	0.589567	0.13829	0.066733	53.4788	1.52621	41.1638	0.281897	0.383959	0	99.9647	1.82263	21.0518	2.3877	3.83311	11.3824	46.2272	0.417616	0.840595	0.984273	9.52073	3.31518
RBL11-4-1_clust8_ap52	Ap43		mat	1.91348	0.171126	0.415484	0.616187	0.128818	0.057161	53.0423	1.5017	41.1547	0.378232	0.430716	0	99.8099	1.70362	18.1624	2.44303	3.73599	12.2341	53.118	0.419216	0.847527	0.983918	7.79606	3.08699
RBL11-4-1_clust8_ap53	Ap44		pyx	1.79233	0.181127	0.422218	0.577982	0.129756	0.041664	53.0361	1.47701	41.7615	0.377962	0.462175	0	100.26	1.79005	17.3517	2.425	3.81512	12.4372	76.4473	0.419384	0.854484	0.977655	7.57096	2.95692
RBL11-4-1_clust8_ap54	Ap45		pyx	1.82884	0.180499	0.416198	0.557596	0.095561	0.129986	53.2212	1.50714	41.773	0.24891	0.40687	0	100.366	1.7616	17.0099	2.4842	3.99439	16.9711	24.4638	0.418893	0.844054	0.976753	9.79118	3.19563
RBL11-4-1_clust8_ap55	Ap46		mat	1.82663	0.189923	0.42856	0.525317	0.153172	0.058331	52.8642	1.48308	40.9638	0.237901	0.408801	0	99.1397	1.76264	16.3608	2.39804	4.17071	10.3509	55.8968	0.419406	0.852716	0.985292	11.1013	3.12864
RBL11-4-1_clust8_ap56	Ap47		mat	1.79828	0.189962	0.426664	0.54527	0.111422	0.111963	53.4123	1.55059	40.996	0.321012	0.567818	0	100.031	1.78823	16.6293	2.42929	4.05895	14.1585	27.6342	0.417937	0.833325	0.986256	8.44153	2.5768
RBL11-4-1_clust8_ap57	Ap48		pyx	1.78661	0.235836	0.433595	0.616708	0.129272	0.082172	53.2068	1.51238	40.3297	0.395036	0.738305	0	99.4663	1.78352	13.7394	2.37751	3.71681	12.3682	38.3204	0.418433	0.843256	0.994362	7.65244	2.15492
RBL11-4-1_pyx_ap60	Ap49		pyx	1.65068	0.158806	1.84537	1.95879	0.164288	0.059229	50.2217	1.28387	38.7102	2.77413	0.589615	0	99.4166	1.90739	13.7188	0.963236	1.75346	9.85557	53.8931	0.431244	0.747789	1.02524	2.47915	3.48138
RBL11-4-1_pyx_ap61	Ap50		pyx	1.74358	0.209397	0.518148	1.00496	0.173974	0.065472	53.6293	1.4828	41.2833	0.598916	0.735573	4e-06	101.445	1.84289	11.2207	2.27905	2.64953	9.29796	49.6345	0.417395	0.690564	0.986421	5.77425	3.00933
RBL11-4-1_pyx_ap62_1	Apa51		pyx	1.72405	0.174793	0.418288	0.643716	0.104206	0.042467	55.2144	1.48199	41.7718	0.313749	0.667901	4e-06	102.557	1.88625	13.4194	2.6658	3.62254	14.7095	73.6837	0.411078	0.689551	0.980701	8.9958	3.19318
RBL11-4-1_pyx_ap62_2			pyx	1.83364	0.200799	0.413283	0.593876	0.142968	0.049786	54.4414	1.47106	41.0791	0.293763	0.642047	4e-06	101.162	1.77928	11.061	2.6979	3.86484	11.1644	64.4681	0.414033	0.691291	0.98886	9.45312	3.3377
RBL11-4-1_pyx_ap63	Apa52		pyx	1.85597	0.127031	0.40089	0.604614	0.151811	0.026685	54.7592	1.50598	41.9396	0.329203	0.427187	4e-06	102.128	1.75839	17.0894	2.78539	3.90252	10.5144	119.272	0.412991	0.684343	0.978157	8.59763	4.34351
RBL11-4-1_pyx_ap64	Apa53		pyx	1.69087	0.177549	0.41331	0.624973	0.142854	0.059418	52.5843	1.47569	41.9871	0.361791	0.635203	0	100.153	1.88726	13.294	2.71233	3.75335	11.2938	55.8621	0.421614	0.691331	0.977083	8.01799	3.28103
RBL11-4-1_pyx_ap65_1	Apa54		pyx	1.78709	0.111517	0.414976	0.581004	0.155562	0.076412	54.0335	1.49378	41.8719	0.288596	0.414816	4e-06	101.229	1.7992	19.8515	2.69067	3.90579	10.0685	42.388	0.415688	0.68912	0.978877	9.31574	4.41134
RBL11-4-1_pyx_ap65_2			pyx	1.79266	0.165461	0.407168	0.692905	0.122609	0.070373	53.9884	1.49868	41.1643	0.390437	0.516241	4e-06	100.809	1.82192	13.3619	2.74915	3.51522	12.861	44.1009	0.416092	0.685944	0.988428	7.94052	3.79465
RBL11-4-1_pyx_ap66	Apa55		pyx	1.8778	0.165472	0.407632	0.620351	0.142383	0.05823	53.9693	1.47933	41.7078	0.379245	0.499798	0	101.307	1.76086	13.4614	2.74245	3.69706	11.2864	54.0003	0.415906	0.69104	0.981206	7.98994	3.87803
RBL11-4-1_pyx_ap67	Apa56		pyx	1.7498	0.201494	0.407751	0.584408	0.126336	0.071567	54.3164	1.46456	41.5475	0.379204	0.662392	0	101.512	1.83826	11.3567	2.71121	3.89414	12.5318	43.4468	0.414502	0.693437	0.98266	7.419	3.22255
RBL11-4-1_pyx_ap68	Apa57		pyx	1.67103	0.141955	1.16499	1.07126	0.133434	0.0606	52.6911	1.39197	40.277	2.87747	0.469967	0	101.951	1.891	15.4512	1.2807	2.55491	11.9999	52.1664	0.421339	0.716799	1.00398	2.39804	4.10476
RBL11-4-1_pyx_ap69	Apa58		pyx	1.73967	0.155605	0.418707	0.804068	0.144255	0.063071	54.4724	1.48392	41.1893	0.32022	0.491041	4e-06	101.282	1.85688	14.2055	2.67864	3.12292	10.9586	50.7538	0.413986	0.690785	0.98719	8.68725	3.98606
RBL11-4-2_clust1_ap1	Apa59		pyx	1.6504	0.148551	0.432818	0.585711	0.092069	0.144451	54.2664	1.50662	41.9574	0.268661	0.409631	4e-06	101.463	2.27941	19.1436	2.29946	3.83469	17.5444	21.7324	0.393838	0.890036	0.990862	10.7399	3.34998
RBL11-4-2_clust1_ap1_2			pyx	1.59645	0.12137	0.408912	0.552491	0.142138	0.003639	54.2611	1.46019	41.4283	0.231216	0.390187	8e-06	100.596	2.33647	23.918	2.43186	4.00476	11.0729	877.251	0.39396	0.903272	0.996643	12.2721	3.43856
RBL11-4-2_clust2_ap1	Apa60		pyx	1.59272	0.077487	0.401815	0.448862	0.132567	0.098264	53.8245	1.43981	41.3817	0.245949	0.265845	4e-06	99.9096	2.35271	35.2896	2.48049	4.74091	11.7945	31.5427	0.395229	0.911269	0.997499	11.3036	4.60426
RBL11-4-2_clust2_ap2	Apa61		pyx	1.73098	0.133596	0.399302	0.531394	0.134506	0.031549	54.2512	1.47758	40.73	0.254528	0.395912	4e-06	100.071	2.19031	21.1664	2.45417	4.15979	11.6224	101.512	0.393821	0.896897	1.00541	10.641	3.4752
RBL11-4-2_clust2_ap3	Apa62		pyx	1.68572	0.152107	0.427997	0.751237	0.130746	0.012131	53.986	1.5241	41.8318	0.26621	0.371645	0	101.14	2.27245	19.3486	2.34503	3.28186	12.1784	258.664	0.395112	0.883582	0.993419	10.6116	3.63253
RBL11-4-2_clust2_ap4	Apa63		pyx	1.70364	0.121333	0.493204	0.85466	0.156254	-0.00244	54.3363	1.49911	41.7298	0.404298	0.449791	-1e-05	101.746	2.21794	22.3164	2.11504	2.99739	10.2893	-1274.9	0.393511	0.891488	0.994283	8.12176	3.11976
RBL11-4-2_clust2_ap5	Apa64		pyx	1.6822	0.092391	0.419322	0.677714	0.128001	0.057069	54.5405	1.56761	41.3697	0.321065	0.346279	0	101.202	2.25358	30.4807	2.37585	3.51063	12.291	56.7633	0.393126	0.866356	0.998525	9.32684	3.8002

## Sheet: H2O calc from apatite
Apatites in Pyroxenes					Apatites in the Matrix					Summary
point name	deposit	WC from Cl (wt%)	err (wt%)		point name	deposit	WC from Cl (wt%)	err (wt%)
RBL11-1s_pl1_ap1_rim	subplinian	2.19323	0.784255		RBL11-1s_pl1_ap2_1	subplinian	1.83997	0.652218		Deposit	Average pyroxene (wt%)	err (wt%)	Average matrix (wt%)	err (wt%)
RBL11-1s_pl1_ap1_core1	subplinian	2.07517	0.742117		RBL11-1s_pl1_ap2_2	subplinian	1.93987	0.686808		subplinian	2.14287	0.75989	1.84342	0.655563
RBL11-1s_pl1_ap1_core2	subplinian	2.09402	0.742936		RBL11-1s_pl1_ap3_1	subplinian	2.05924	0.717751		effusive	2.01309	0.719239	1.34115	0.51068
RBL11-1s_px1_ap1	subplinian	1.94636	0.694283		RBL11-1s_pl1_ap3_2	subplinian	1.81529	0.641284		vulcanian	2.13152	0.751379	1.6442	0.590378
RBL11-1s_px1_ap2	subplinian	2.10826	0.755061		RBL11-1s_pl1_ap4_1	subplinian	1.79128	0.643113
RBL11-1s_px1_ap3	subplinian	2.03778	0.722822		RBL11-1s_pl1_ap4_2	subplinian	1.83446	0.656437			min (wt%)	err (wt%)	average (wt%)	err (wt%)	max (wt%)	err (wt%)
RBL11-1s_px1_ap4	subplinian	1.89778	0.685168		RBL11-1s_px3-4_ap6	subplinian	1.95234	0.686675		effusive-rim	0.358982	0.160714	1.19928	0.469153	1.79213	0.679257
RBL11-1s_px1_ap5	subplinian	2.4625	0.852838		RBL11-1s_px3-4_ap10	subplinian	1.69863	0.621417
RBL11-1s_px1_ap6	subplinian	2.39344	0.84651		RBL11-1s_px3-4_ap11	subplinian	1.93238	0.6791
RBL11-1s_px1_ap7	subplinian	2.44255	0.852328		RBL11-1s_px3-4_ap12_rim	subplinian	1.6741	0.607562
RBL11-1s_px2_ap1	subplinian	2.18074	0.770658		RBL11-1s_px3-4_ap12_core	subplinian	1.85086	0.654049		Legend
RBL11-1s_px2_ap2	subplinian	1.90728	0.692885		RBL11-1s_px3-4_ap12_core2	subplinian	1.93224	0.68486		WC from Cl (wt%)	Melt water content in weight percent calculated from apatite point analysis (point name) and 4000 ppm Cl in the melt
RBL11-1s_px2_ap3	subplinian	2.17093	0.765313		RBL11-1s_px5_ap4	subplinian	1.9415	0.685576		err (wt%)	Model uncertainty in wt %
RBL11-1s_px2_ap3_1	subplinian	2.37974	0.824179		RBL11-1s_px5_ap2	subplinian	1.90956	0.674302
RBL11-1s_px2_ap4_1	subplinian	1.93208	0.692823		RBL11-1s_mat_ap1	subplinian	1.69151	0.604083
RBL11-1s_px2_ap4_2	subplinian	2.13402	0.755507		RBL11-1s_M2_ap1_1	subplinian	2.14627	0.74384
RBL11-1s_px3-4_ap2_1	subplinian	2.26302	0.790897		RBL11-1s_M2_ap1_2	subplinian	2.18924	0.745932
RBL11-1s_px3-4_ap2_2	subplinian	2.1073	0.744335		RBL11-1s_M2_ap2_core	subplinian	1.53549	0.562015
RBL11-1s_px3-4_ap2_3	subplinian	2.13375	0.754578		RBL11-1s_M2_ap2_rim	subplinian	1.93526	0.685547
RBL11-1s_px3-4_ap3_1	subplinian	1.96847	0.711731		RBL11-1s_mat_ap2_core	subplinian	1.65469	0.600008
RBL11-1s_px3-4_ap3_2	subplinian	2.10793	0.75224		RBL11-1s_mat_ap2_rim1	subplinian	1.78004	0.643712
RBL11-1s_px3-4_ap3_3	subplinian	2.23707	0.78261		RBL11-1s_mat_ap3	subplinian	1.66621	0.604811
RBL11-1s_px3-4_ap4	subplinian	2.16264	0.763319		RBL11-1s_mat_ap4	subplinian	1.78788	0.641632
RBL11-1s_px3-4_ap5	subplinian	1.91396	0.690156		RBL11-1s_mat_ap6	subplinian	1.68369	0.610785
RBL11-1s_px3-4_ap7	subplinian	2.41145	0.844597		RBL11-3-4_mat_ap1	effusive	1.62524	0.590293
RBL11-1s_px3-4_ap8	subplinian	2.33311	0.810071		RBL11-3-4_mat_ap1_2	effusive	1.81352	0.646948
RBL11-1s_px3-4_ap9	subplinian	2.37204	0.836938		RBL11-3-4_mat_ap1_3	effusive	1.39926	0.53985
RBL11-1s_px3-4_ap13	subplinian	2.05878	0.738522		RBL11-3-4_mat_ap2_1	effusive	1.6155	0.59984
RBL11-1s_px3-4_ap14	subplinian	2.01236	0.719633		RBL11-3-4_mat_ap2_2	effusive	1.47623	0.555097
RBL11-1s_px5_ap1	subplinian	1.95229	0.699976		RBL11-3-4_mat_ap2_3	effusive	1.59984	0.591151
RBL11-1s_px5_ap5	subplinian	2.06817	0.735897		RBL11-3-4_mat_ap3_1	effusive	0.408044	0.18048
RBL11-1s_px5_ap3	subplinian	2.11374	0.761282		RBL11-3-4_mat_ap3_2	effusive	1.4388	0.592989
RBL11-3-4_pyx1_inc_ap1	effusive	2.09934	0.754066		RBL11-3-4_mag1_ap1_1	effusive	1.8653	0.671534
RBL11-3-4_clust1_ap1	effusive	1.71577	0.65411		RBL11-3-4_mag1_ap1_2	effusive	1.64938	0.59631
RBL11-3-4_clust1_ap2	effusive	1.3	0.522391		RBL11-3-4_attached_ap1	effusive	1.15305	0.452122
RBL11-3-4_clust1_ap4_1	effusive	2.06883	0.751003		RBL11-3-4_attached_ap2	effusive	0.943615	0.376277
RBL11-3-4_clust1_ap4_2	effusive	1.78231	0.669906		RBL11-3-4_attached_ap3	effusive	1.21951	0.491439
RBL11-3-4_clust1_ap5	effusive	2.38571	0.824723		RBL11-3-4_attached_ap4	effusive	0.723789	0.311411
RBL11-3-4_clust1_ap8_1	effusive	1.86668	0.676336		RBL11-3-4_clust1_ap6_1	effusive	1.62683	0.597341
RBL11-3-4_clust1_ap8_2	effusive	1.97629	0.715767		RBL11-3-4_clust1_ap6_2	effusive	1.33751	0.503896
RBL11-3-3_pyx_ap1_1	effusive	1.80056	0.65354		RBL11-3-4_mat_ap4_rim	effusive	1.1447	0.484867
RBL11-3-3_pyx_ap1_2	effusive	1.87672	0.636989		RBL11-3-4_mat_ap4_core1	effusive	1.93102	0.701708
RBL11-3-3_pyx_ap2_1	effusive	2.1963	0.762825		RBL11-3-4_mat_ap4_core2	effusive	1.70322	0.627067
RBL11-3-3_pyx_ap2_2	effusive	2.21877	0.774207		RBL11-3-4_mat_ap4_rim2	effusive	1.79213	0.679257
RBL11-3-3_pyx_ap3_1	effusive	2.02028	0.722592		RBL11-3-4_attached_ap5_core	effusive	1.47454	0.574737
RBL11-3-3_pyx_ap3_2	effusive	2.14713	0.757232		RBL11-3-4_attached_ap5_rim	effusive	0.358982	0.160714
RBL11-3-3_pyr_ap4	effusive	2.35499	0.825694		RBL11-3-4_matrix_ap5_1	effusive	1.34012	0.533885
RBL11-3-3_pyr_ap6	effusive	2.46184	0.834593		RBL11-3-4_matrix_ap5_2	effusive	1.42146	0.557028
RBL11-3-3_pyr_ap7	effusive	2.16358	0.773808		RBL11-3-4_attached_ap6	effusive	0.844908	0.35323
RBL11-3-3_pyr_ap8	effusive	1.93547	0.706046		RBL11-3-4_attached_ap7	effusive	1.55126	0.556314
RBL11-3-3_pyr_ap9	effusive	2.11101	0.758903		RBL11-3-4_attached_ap8	effusive	1.55541	0.580285
RBL11-3-3_pyx_ap12_2	effusive	1.94395	0.692651		RBL11-3-4_clust2_mat_ap6_rim	effusive	0.91847	0.38447
RBL11-3-3_pyx_ap13	effusive	2.35148	0.804983		RBL11-3-4_clust2_mat_ap6_2	effusive	1.57461	0.58741
RBL11-3-3_pyx_ap15	effusive	1.48698	0.565186		RBL11-3-4_clust2_mat_ap6_core	effusive	1.55379	0.559589
RBL11-3-3_pyx_ap16	effusive	2.20018	0.789813		RBL11-3-4_clust2_mat_ap6_rim2	effusive	1.43061	0.574084
RBL11-3-1_pyx1_ap1	effusive	2.06228	0.762933		RBL11-3-4_clust2_mat_ap7_1	effusive	1.46952	0.58657
RBL11-3-1_pyx1_ap2	effusive	2.65123	0.902048		RBL11-3-4_clust2_mat_ap7_2	effusive	1.46114	0.579475
RBL11-3-1_pyx1_ap3	effusive	1.84636	0.673008		RBL11-3-4_clust2_mat_ap8_1	effusive	1.54592	0.565598
RBL11-3-1_pyx1_ap5	effusive	2.60586	0.875696		RBL11-3-4_clust2_mat_ap8_2	effusive	1.49154	0.548925
RBL11-3-1_pyx1_ap6	effusive	2.17527	0.756164		RBL11-3-4_clust2_mat_ap9_1	effusive	0.917536	0.387663
RBL11-3-1_pyx1_ap7	effusive	2.3849	0.829905		RBL11-3-4_clust2_mat_ap9_2	effusive	0.604709	0.261967
RBL11-3-2_pyx1_ap1	effusive	1.52009	0.585361		RBL11-3-4_mat_ap10_rim1	effusive	1.28285	0.488591
RBL11-3-2_pyx1_ap2_1	effusive	1.82765	0.6624		RBL11-3-4_mat_ap10_core	effusive	1.26649	0.47906
RBL11-3-2_pyx1_ap2_2	effusive	1.67672	0.623039		RBL11-3-4_mat_ap10_core2	effusive	1.05345	0.41001
RBL11-3-2_pyx1_ap3_1	effusive	1.83436	0.659401		RBL11-3-4_mat_ap10_rim2	effusive	1.27146	0.498083
RBL11-3-2_pyx1_ap3_2	effusive	1.78473	0.647181		RBL11-3-4_mat_ap11_rim1	effusive	1.40522	0.519083
RBL11-3-2_pyx2_ap1	effusive	2.00869	0.711595		RBL11-3-4_mat_ap11_core1	effusive	1.76206	0.617604
RBL11-3-2_pyx3_ap1	effusive	1.25047	0.466473		RBL11-3-4_mat_ap11_core2	effusive	1.42795	0.514944
RBL11-3-2_pyx3_ap2	effusive	2.12565	0.779011		RBL11-3-4_mat_ap11_rim2	effusive	1.41324	0.518346
RBL11-3-2_pyx5_ap2	effusive	2.44695	0.8491		RBL11-3-4_mat_attached_ap9	effusive	1.08478	0.40908
RBL11-3-2_pyx5_ap3	effusive	1.9243	0.673132		RBL11-3-4_mat_ap12_core	effusive	1.45133	0.531992
RBL11-3-2_pyx5_ap4	effusive	1.9341	0.685739		RBL11-3-4_mat_ap12_rim	effusive	0.975111	0.384033
RBL11-4-1-clust7_ap13	vulcanian	1.97937	0.704078		RBL11-4-1-clust7_ap1	vulcanian	1.76648	0.628801
RBL11-4-1-clust7_ap15	vulcanian	1.93895	0.699033		RBL11-4-1-clust7_ap2	vulcanian	1.50844	0.553696
RBL11-4-1-clust7_ap18	vulcanian	1.83279	0.657766		RBL11-4-1-clust7_ap3	vulcanian	1.40288	0.519688
RBL11-4-1-clust7_ap20	vulcanian	1.99198	0.711819		RBL11-4-1-clust7_ap4	vulcanian	1.61293	0.57341
RBL11-4-1-clust7_ap21	vulcanian	1.8137	0.655559		RBL11-4-1-clust7_ap6	vulcanian	1.54506	0.559433
RBL11-4-1-clust7_ap23	vulcanian	2.00015	0.717485		RBL11-4-1-clust7_ap8	vulcanian	1.46718	0.533378
RBL11-4-1_clust1_ap32	vulcanian	1.73291	0.627011		RBL11-4-1-clust7_ap9	vulcanian	1.51227	0.550745
RBL11-4-1_clust1_ap33	vulcanian	1.78224	0.64127		RBL11-4-1-clust7_ap11	vulcanian	1.6326	0.588445
RBL11-4-1_clust1_ap34	vulcanian	1.75753	0.637425		RBL11-4-1-clust7_ap14	vulcanian	1.64093	0.592499
RBL11-4-1_clust1_ap36	vulcanian	1.87273	0.679348		RBL11-4-1-clust7_ap16	vulcanian	1.54106	0.559613
RBL11-4-1_clust1_ap40	vulcanian	1.88977	0.694137		RBL11-4-1-clust7_ap17	vulcanian	1.6536	0.591818
RBL11-4-1_clust8_ap49	vulcanian	1.90175	0.67456		RBL11-4-1-clust7_ap17_2	vulcanian	1.62166	0.579496
RBL11-4-1_clust8_ap50	vulcanian	1.76399	0.642036		RBL11-4-1-clust7_ap24	vulcanian	1.7992	0.637317
RBL11-4-1_clust8_ap53	vulcanian	2.08323	0.739735		RBL11-4-1-clust2_ap25	vulcanian	1.73345	0.624224
RBL11-4-1_clust8_ap54	vulcanian	1.91687	0.687163		RBL11-4-1-clust2_ap28	vulcanian	1.78582	0.634141
RBL11-4-1_clust8_ap57	vulcanian	1.90364	0.679065		RBL11-4-1-clust2_ap28_2	vulcanian	1.68639	0.599317
RBL11-4-1_pyx_ap60	vulcanian	3.04328	1.0476		RBL11-4-1-clust2_ap29	vulcanian	1.67476	0.599325
RBL11-4-1_pyx_ap61	vulcanian	2.27682	0.795656		RBL11-4-1-mat_ap3_1	vulcanian	1.52028	0.543004
RBL11-4-1_pyx_ap62_1	vulcanian	2.41065	0.83489		RBL11-4-1-mat_ap3_2	vulcanian	1.45801	0.530952
RBL11-4-1_pyx_ap62_2	vulcanian	2.03551	0.729623		RBL11-4-1-mat_ap3_3	vulcanian	1.38431	0.512849
RBL11-4-1_pyx_ap63	vulcanian	1.98682	0.712416		RBL11-4-1-mat_ap3_ap30	vulcanian	1.69297	0.606275
RBL11-4-1_pyx_ap64	vulcanian	2.38171	0.823351		RBL11-4-1_clust1_ap31	vulcanian	1.73423	0.617761
RBL11-4-1_pyx_ap65_1	vulcanian	2.1259	0.751627		RBL11-4-1_clust1_ap37	vulcanian	1.68993	0.60265
RBL11-4-1_pyx_ap65_2	vulcanian	2.04617	0.7266		RBL11-4-1_clust1_ap39	vulcanian	1.81714	0.641607
RBL11-4-1_pyx_ap66	vulcanian	1.94639	0.70394		RBL11-4-1_clust1_ap38	vulcanian	1.65527	0.601126
RBL11-4-1_pyx_ap67	vulcanian	2.31797	0.811112		RBL11-4-1_clust8_ap42	vulcanian	1.57787	0.574642
RBL11-4-1_pyx_ap68	vulcanian	2.85506	0.97585		RBL11-4-1_clust8_ap42_2	vulcanian	1.86083	0.657926
RBL11-4-1_pyx_ap69	vulcanian	2.2392	0.783524		RBL11-4-1_clust8_ap43	vulcanian	1.78308	0.636108
RBL11-4-2_clust1_ap1	vulcanian	2.45752	0.838297		RBL11-4-1_clust8_ap44	vulcanian	1.73861	0.617338
RBL11-4-2_clust1_ap1_2	vulcanian	2.65899	0.898305		RBL11-4-1_clust8_ap45	vulcanian	1.67774	0.597463
RBL11-4-2_clust2_ap1	vulcanian	2.67792	0.90622		RBL11-4-1_clust8_ap46	vulcanian	1.92066	0.672986
RBL11-4-2_clust2_ap2	vulcanian	2.17453	0.763372		RBL11-4-1_clust8_ap47	vulcanian	1.65119	0.593334
RBL11-4-2_clust2_ap3	vulcanian	2.28913	0.789001		RBL11-4-1_clust8_ap47_2	vulcanian	1.59254	0.579433
RBL11-4-2_clust2_ap4	vulcanian	2.35415	0.813491		RBL11-4-1_clust8_ap48	vulcanian	1.6242	0.583379
RBL11-4-2_clust2_ap5	vulcanian	2.16404	0.745904		RBL11-4-1_clust8_ap51	vulcanian	1.75325	0.618857
					RBL11-4-1_clust8_ap52	vulcanian	1.48695	0.54645
					RBL11-4-1_clust8_ap55	vulcanian	1.64912	0.59477
					RBL11-4-1_clust8_ap56	vulcanian	1.62662	0.580106

## Sheet: Pressure calculations from WC
Pressure calculated using the model of Papale et al. (2006)																		density	2600	kg/m3
Sample	deposit	T (°C)	SiO2 (wt%)	TiO2 (wt%)	Al2O3 (wt%)	Fe2O3 (wt%)	FeO (wt%)	MnO (wt%)	MgO (wt%)	CaO (wt%)	Na2O (wt%)	K2O (wt%)	H2O (wt%)	CO2 (wt%)	P (MPa)	Depth (m)
RBL11-1 average	pumice	975	64.0419	0.894405	14.4731	1.5459	4.5289	0.143373	1.55427	3.94888	5.26628	3.0235	2.14	0.015	83.08	3273.96
													2.14	1e-05	32.934	1297.84
RBL11-1 - max													2.46	0.015	89.61	3531.29
													2.46	1e-05	41.02	1616.49
RBL11-1 -min													1.9	0.015	78.27	3084.41
													1.9	1e-05	27.4192	1080.52
RBL11-3 - average	lava flow	975	64.54	0.91	15.74	1.26	3.79	0.19	1.49	4.05	4.66	3	2.01	0.015	69.16	2725.41
													2.01	1e-05	34.6588	1365.81
RBL11-3 - max													2.65	0.015	86.84	3422.13
													2.65	1e-05	52.8538	2082.83
RBL11-3 - min													1.25	0.015	51.94	2046.82
													1.25	1e-05	17.5851	692.982
RBL11-3 (degassed - min)													0.4	0.015	37.2014	1466.01
													0.4	1e-05	4.2151	166.106
RBL11-3 (matrix rim - average)													1.2	0.015	50.9472	2007.69
													1.2	1e-05	16.6315	655.403
RBL11-4 - average	bomb	975	66.25	0.91	14.92	1.22	3.76	0.17	1.16	3.18	4.73	2.98	2.13	0.015	73.42	2893.28
													2.13	1e-05	36.5224	1439.25
RBL11-4 - max													3.04	0.015	99.11	3905.66
													3.04	1e-05	63.6361	2507.73
RBL11-4 - min													1.73	0.015	64.03	2523.25
													1.73	1e-05	26.8293	1057.27

## Sheet: Melt inclusions analyses 
SAMPLE	Eruption deposit	SiO2	TiO2	Al2O3	FeO	MnO	MgO	CaO	Na2O	K2O	P2O5	SO3	Cl	F	O	TOTAL
RBL11-3-4_Px4_MI	Lava flow	69.0962	0.612091	14.6392	1.94343	0.131359	1.2449	2.435	5.10311	3.18231	0.143343	0.134808	0.401216	0.04617	-2e-05	99.1132
RBL11-3-4_Px5_MI1	Lava flow	68.984	0.628506	16.2574	1.82214	0.072104	0.192378	2.22951	5.70443	3.2601	0.308936	0.096441	0.386688	0.031985	4e-06	99.9747
RBL11-3-4_Px6_MI	Lava flow	69.6646	0.749673	15.7285	2.19462	0.124718	0.436593	2.27509	5.5376	3.2904	0.254269	0.163125	0.374625	0.045153	0	100.839
RBL11-3-4_Px8_MI	Lava flow	68.8116	0.641458	15.958	1.11257	0.085661	0.373941	1.75306	5.46174	3.2298	0.369628	0.09266	0.341916	0	4e-06	98.1585
RBL11-3-3_Px1_MI1	Lava flow	65.6212	0.81119	13.529	3.88603	0.196045	3.10192	5.96045	4.37226	2.40639	0.241938	0.125035	0.352353	0.03308	0	100.637
RBL11-3-3_Px1_MI2	Lava flow	68.909	0.812927	14.9702	2.65499	0.126781	0.694619	3.6862	3.33159	3.4582	0.378546	0.112801	0.527419	0.08241	0	99.7457
RBL11-3-4_Px1_MI1_1	Lava flow	70.923	0.678976	15.7289	1.98232	0.102072	0.26986	1.96169	5.39772	3.44492	0.314081	0.107878	0.235314	0	0	101.107
RBL11-3-4_Px1_MI1_2	Lava flow	65.4247	0.589656	16.4846	3.60045	0.055033	1.04384	3.9336	5.16812	2.81987	0.233982	0.013761	0.147273	0	0	99.4791
RBL11-3-3_pyx1_MI3	Lava flow	65.821	0.953343	15.1854	3.83894	0.206713	0.805412	3.50867	3.79086	4.20662	0.383821	0.104079	0.522649	0.011245	0	99.3387
RBL11-3-3_pyx1_MI4	Lava flow	62.4221	0.781137	14.1793	4.1975	0.176829	2.06771	5.73976	3.40751	3.82726	0.326372	0.091218	0.376428	0.028539	1.5e-05	97.6217
RBL11-3-3_pyx1_MI5	Lava flow	66.7326	0.823402	15.7533	3.47309	0.176254	0.769138	3.56552	3.82067	4.32513	0.229792	0.066104	0.370409	0.019806	0	100.125
RBL11-3-3_pyx2_MI1	Lava flow	66.4995	0.703285	16.2971	3.45394	0.133047	0.521207	2.55197	4.31575	4.61151	0.40402	0.061071	0.406771	0.055565	8e-06	100.015
RBL11-3-3_pyx2_MI2	Lava flow	68.9561	0.602419	15.4915	2.72455	0.114953	0.50686	2.71714	5.12989	3.08198	0.481892	0.121118	0.192804	0	1.5e-05	100.092
RBL11-3-3_pyx3_MI	Lava flow	68.2393	0.8171	15.4785	2.52512	0.120676	0.759488	2.5351	4.87058	3.33991	0.359958	0.129424	0.412827	0.005909	8e-06	99.5939
RBL11-3-3_plg5_MI_pyx	Lava flow	69.0829	0.687822	15.1211	1.86413	0.086025	0.478953	1.77068	5.44015	3.28631	0.229756	0.084063	0.39017	0	0	98.4943
RBL11-4-1_clust1_px_MI	ballistic bomb	68.2119	0.790284	15.3906	2.53707	0.104453	0.335712	2.37289	5.52655	3.51852	0.167244	0.123008	0.42374	0.035088	-1e-05	99.537
RBL11-4-1_clust1_px2_MI1_1	ballistic bomb	67.0047	0.884082	15.3374	4.15093	0.123285	0.20688	1.63165	5.9663	5.14116	0.479729	0.099495	0.461449	0	0	101.431
RBL11-4-1_clust1_px2_MI1_2	ballistic bomb	64.6179	0.881709	15.3242	4.22529	0.12236	0.266467	1.71354	6.04163	5.07386	0.580583	0.080524	0.449592	0	0	99.3317
RBL11-4-1_clust7_MI1	ballistic bomb	66.8352	1.03416	15.6512	4.29838	0.172582	0.715984	2.67457	5.22729	3.10756	0.290544	0.164604	0.426909	0.005997	0	100.605
RBL11-4-1_clust7_MI2	ballistic bomb	67.9979	0.777621	15.8583	2.08387	0.121233	0.567753	2.78845	5.37033	3.2521	0.264336	0.160406	0.417871	0.013846	0	99.674
RBL11-4-1_clust7_MI4	ballistic bomb	69.4275	0.691468	15.5541	1.25777	0.062783	0.349765	1.8618	5.51487	3.3946	0.211154	0.170701	0.389531	0.037208	4e-06	98.9233
RBL11-4-1_pyx6_MI1	ballistic bomb	65.0837	0.830864	15.7629	3.25372	0.04318	0.111804	1.01421	7.51326	3.82741	0.311206	0.106932	0.397589	0.020551	8e-06	98.2773
RBL11-4-1_pyx6_MI2_1	ballistic bomb	67.9984	0.929622	15.144	2.43997	0.045777	0.385996	2.71288	6.25592	1.63526	0.347849	0.096521	0.316588	0	4e-06	98.2617
RBL11-4-1_pyx6_MI2_2	ballistic bomb	66.6379	0.872509	15.554	2.51092	0.079813	0.489291	1.72404	5.2178	3.42714	0.295562	0.097912	0.425371	0.023349	0	97.3556
RBL11-4-1_pyx6_MI2_3	ballistic bomb	67.2443	0.833325	15.432	2.42379	0.086534	0.469925	1.86115	5.32117	3.3987	0.266231	0.120911	0.392401	0.009554	0	97.86
RBL11-4-1_pyx6_MI3_1	ballistic bomb	67.2807	0.939172	16.1427	1.95399	0.057445	0.435174	2.08181	5.46107	3.25534	0.311961	0.099158	0.393155	0.015837	0	98.4275
RBL11-4-1_pyx6_MI3_2	ballistic bomb	66.1115	0.95855	15.9979	2.01511	0.086535	0.542006	1.99292	5.31392	3.25028	0.300975	0.101373	0.441503	0	0	97.1102
All melt inclusions are hosted in Pyroxene

## Sheet: Traverses analyses
Distance (μm) - 0 is the rim	x_Cl	x_F	x_OH	F	Na2O	MgO	FeO	MnO	Ce2O3	CaO	Cl	P2O5	O	TOTAL
Sub-plinian - Matrix Apatite 1 - traverse 1							Angle with the c-axis from EBSD			7
0	0.199991	0.318968	0.48104	1.16994	0.117281	0.425627	0.58384	0.141147	0.097485	53.3233	1.36864	41.9083	4e-06	99.1356
1	0.219819	0.3357	0.44448	1.22872	0.131802	0.39897	0.594239	0.111459	0.08903	54.554	1.50117	41.0673	0	99.6767
2	0.243115	0.412605	0.34428	1.50093	0.039964	0.412294	0.511693	0.124234	0.095158	54.6943	1.65006	40.3877	0	99.4163
3	0.233026	0.367881	0.399093	1.3438	0.056607	0.383446	0.500223	0.149165	0.084125	54.9975	1.58816	40.6758	4e-06	99.7788
4	0.232003	0.379775	0.388223	1.39126	0.140739	0.410311	0.571416	0.130368	0.037815	54.9909	1.58576	40.7225	4e-06	99.9811
5	0.244235	0.43391	0.321854	1.60862	0.093888	0.413215	0.578112	0.125553	0.075553	54.222	1.68937	41.7244	4e-06	100.531
6	0.234744	0.418426	0.34683	1.51889	0.143721	0.419714	0.540789	0.155358	0.053664	55.3501	1.58988	39.7106	0	99.4827
7	0.22471	0.365988	0.409302	1.3456	0.155424	0.420131	0.523896	0.105831	0.097625	55.4209	1.54147	40.7499	1.1e-05	100.361
8	0.24113	0.390411	0.36846	1.41788	0.168063	0.412108	0.523404	0.150641	0.120732	54.0826	1.63392	40.415	4e-06	98.9244
9	0.23381	0.412775	0.353415	1.52496	0.105437	0.409034	0.534969	0.126177	0.063467	55.3187	1.61165	40.984	0	100.678
10	0.231743	0.42203	0.346227	1.55419	0.115817	0.402317	0.543673	0.157317	0.068323	55.305	1.59232	40.7446	0	100.484
11	0.243822	0.42306	0.333119	1.5418	0.100944	0.401753	0.535744	0.121865	0.02561	54.6301	1.65791	40.3572	0	99.3729
12	0.241934	0.425567	0.332499	1.54887	0.150562	0.409937	0.489814	0.10251	0.117139	54.8535	1.64288	40.1207	0	99.4359
13	0.23668	0.385191	0.378128	1.40031	0.172544	0.402705	0.498591	0.112879	0.10125	54.2519	1.60536	40.4727	0	99.0182
14	0.242583	0.419657	0.33776	1.52925	0.057792	0.421201	0.491204	0.151142	0.101249	54.8087	1.64933	40.2962	4e-06	99.5061
15	0.238134	0.3737	0.388165	1.34976	0.037601	0.397327	0.505041	0.166216	0.098777	53.8812	1.60479	40.3372	-1e-05	98.3779
16	0.240712	0.413896	0.345391	1.51939	0.094065	0.411596	0.564905	0.126157	0.064662	54.4867	1.64869	41.0173	0	99.9335
17	0.249001	0.419576	0.331424	1.51919	0.049467	0.427985	0.490049	0.125151	0.119526	53.9461	1.68215	40.3253	0	98.6849
18	0.246444	0.402453	0.351103	1.49152	0.087016	0.415206	0.486402	0.130833	0.10368	55.0441	1.7041	41.4687	8e-06	100.932
19	0.240601	0.406026	0.353373	1.49769	0.155721	0.399718	0.521468	0.142157	0.052438	54.4903	1.65588	41.3852	0	100.301
20	0.248629	0.442754	0.308617	1.61686	0.096592	0.410452	0.483891	0.12604	0.086559	54.7131	1.69404	40.482	0	99.7095
21	0.240131	0.407747	0.352122	1.49441	0.092228	0.401444	0.488509	0.126619	0.023176	54.9849	1.64206	40.75	0	100.003
22	0.241363	0.410223	0.348414	1.51474	0.090209	0.392461	0.48193	0.110994	0.121982	54.7413	1.66284	41.3392	0	100.456
23	0.243022	0.416294	0.340683	1.53441	0.16637	0.415626	0.531421	0.133181	0.090251	54.8266	1.67128	41.0545	0	100.424
24	0.247143	0.426606	0.326252	1.55694	0.106334	0.423384	0.503164	0.121441	0.02562	54.0178	1.68289	40.7326	0	99.1702
25	0.239214	0.423755	0.337031	1.54908	0.156299	0.40678	0.47493	0.12975	0.124272	53.7529	1.63158	40.9543	0	99.1799
Sub-plinian - Matrix Apatite 6 - traverse 1							Angle with the c-axis from EBSD			0
0	0.184627	0.433857	0.381516	1.57075	0.126482	0.419945	0.592985	0.113583	0.099793	53.7628	1.24715	40.7739	4e-06	98.7075
1	0.163963	0.34539	0.490647	1.26481	0.11753	0.418652	0.553944	0.149066	0.096208	54.799	1.12027	41.3427	4e-06	99.8622
2	0.170484	0.362486	0.46703	1.34164	0.092167	0.423666	0.569152	0.115885	0.083743	55.3184	1.17731	41.7805	0	100.902
3	0.175184	0.388064	0.436752	1.42856	0.084168	0.390421	0.549825	0.131703	0.069455	54.9396	1.20324	41.5411	-1e-05	100.338
4	0.177041	0.385947	0.437012	1.41897	0.084527	0.403655	0.529963	0.13225	0.042763	54.4802	1.21446	41.691	0	99.9978
5	0.171379	0.383411	0.44521	1.41781	0.113124	0.40723	0.550001	0.113552	0.124709	54.7036	1.18243	41.9679	0	100.58
6	0.179785	0.382667	0.437548	1.39789	0.093425	0.40042	0.569719	0.109782	0.126472	54.5949	1.22537	41.1561	0	99.6742
7	0.171115	0.361215	0.46767	1.31657	0.147317	0.405175	0.503129	0.131806	0.119404	54.3821	1.16367	41.1817	0	99.3508
8	0.177496	0.371382	0.451122	1.35809	0.05635	0.424212	0.521368	0.122419	0.176393	54.9002	1.21104	41.1129	8e-06	99.883
9	0.181729	0.398617	0.419655	1.46235	0.120838	0.41052	0.50267	0.12752	0.119325	54.513	1.24389	41.4455	4e-06	99.9456
10	0.163793	0.372931	0.463276	1.35589	0.095928	0.419196	0.560712	0.142923	0.026709	54.5953	1.1111	40.8998	0	99.2076
11	0.175612	0.360944	0.463444	1.31611	0.118345	0.396903	0.450906	0.111239	0.014253	54.9902	1.19473	40.9655	4e-06	99.5582
Sub-plinian - Matrix Apatite 6 - traverse 2							Angle with the c-axis from EBSD			0
0	0.176066	0.432441	0.391493	1.54514	0.088877	0.451069	0.624071	0.114963	0.057002	52.7799	1.17376	40.3935	4e-06	97.2283
1	0.175085	0.38208	0.442834	1.40053	0.147723	0.39574	0.54189	0.130311	0.128214	54.3072	1.19743	41.5349	0	99.7839
2	0.175785	0.394856	0.429358	1.44556	0.104626	0.41068	0.529617	0.152932	0.094503	54.7602	1.20072	41.1958	8e-06	99.8946
3	0.171482	0.38772	0.440798	1.42833	0.102489	0.391047	0.608734	0.142609	0.074869	54.8522	1.17867	41.6094	0	100.388
4	0.175047	0.374795	0.450158	1.37884	0.151656	0.40924	0.546772	0.154893	0.099925	55.0645	1.20154	41.4103	0	100.418
5	0.176871	0.386065	0.437064	1.42064	0.070402	0.421409	0.545205	0.141319	0.117754	54.8889	1.21435	41.5099	0	100.33
6	0.174795	0.381341	0.443864	1.40022	0.170404	0.404014	0.454902	0.114706	0.123181	54.6168	1.1975	41.5264	4e-06	100.008
7	0.178056	0.390753	0.431191	1.43463	0.084782	0.414832	0.564131	0.136538	0.117657	54.6081	1.21971	41.4699	0	100.05
8	0.175905	0.364354	0.459741	1.3383	0.167127	0.410705	0.461014	0.11839	0.112406	54.7121	1.20551	41.541	4e-06	100.067
9	0.170778	0.358279	0.470943	1.32782	0.187319	0.402886	0.547943	0.157609	0.121256	55.056	1.1809	41.9701	0	100.952
10	0.176131	0.379546	0.444323	1.38821	0.092087	0.419063	0.557626	0.104813	0.066015	54.6494	1.20196	41.2432	0	99.7224
11	0.17005	0.368244	0.461705	1.35583	0.123122	0.410063	0.545995	0.136078	0.160481	55.1467	1.16818	41.4613	0	100.508
Sub-plinian - Matrix Apatite 11 - traverse 1							Angle with the c-axis from EBSD			0
0	0.214881	0.352526	0.432593	1.26991	0.063406	0.40238	0.565685	0.130729	0.107664	54.1939	1.44425	40.1026	0	98.2805
1	0.22884	0.312469	0.458691	1.13154	0.11468	0.385585	0.550225	0.135337	0.086779	54.5836	1.54617	40.3723	0	98.9062
2	0.227671	0.371776	0.400553	1.34277	0.089436	0.403564	0.509139	0.133469	0.084345	54.1818	1.53423	40.2402	0	98.519
3	0.223442	0.375974	0.400584	1.36899	0.128025	0.39896	0.466294	0.122565	0.092856	53.4665	1.51799	41.1835	4e-06	98.7457
4	0.228399	0.365731	0.40587	1.32856	0.057758	0.392189	0.545779	0.143305	0.096503	54.5571	1.54802	40.4799	4e-06	99.1491
5	0.223251	0.360217	0.416533	1.30445	0.08337	0.400738	0.499234	0.167651	0.069723	54.3313	1.50841	40.4153	0	98.7802
6	0.223657	0.373811	0.402532	1.35655	0.118555	0.388135	0.561283	0.15384	0.084369	54.8144	1.51436	40.2344	0	99.2259
7	0.229153	0.376661	0.394186	1.3646	0.12784	0.397426	0.47234	0.097989	0.092907	53.5444	1.54897	40.7372	0	98.3837
8	0.236386	0.358024	0.405591	1.30371	0.129148	0.413278	0.521113	0.105957	0.0965	54.1209	1.60603	40.6215	4e-06	98.9181
9	0.245009	0.359392	0.395599	1.30058	0.149752	0.40917	0.504761	0.113095	0.123427	53.8049	1.6543	40.2496	0	98.3096
10	0.239783	0.358898	0.401319	1.30424	0.175399	0.424446	0.53886	0.144885	0.053802	54.2477	1.6258	40.2497	4e-06	98.7648
11	0.235016	0.345382	0.419602	1.25561	0.176924	0.400984	0.555612	0.112134	0.014654	54.0628	1.5941	40.4177	4e-06	98.5905
12	0.245493	0.36668	0.387827	1.33186	0.161779	0.405241	0.513935	0.130513	0.065944	53.5742	1.66369	40.5335	0	98.3807
13	0.243234	0.378812	0.377954	1.36853	0.106136	0.404383	0.499442	0.125359	0.188131	53.4889	1.63952	40.229	0	98.0494
14	0.235082	0.321442	0.443476	1.18203	0.131874	0.399885	0.554609	0.157996	0.042752	54.2738	1.6129	41.2818	0	99.6376
15	0.234946	0.363643	0.40141	1.31708	0.164369	0.416423	0.519246	0.117798	0.09774	54.0691	1.5877	40.2514	8e-06	98.5409
16	0.266216	0.461891	0.271893	1.64224	0.180403	0.395253	0.477851	0.115401	0.095233	51.4408	1.76601	39.9675	4e-06	96.0807
17	0.203626	0.361002	0.435371	1.31512	0.104422	0.405352	0.512199	0.147581	0.043951	53.3229	1.38405	41.195	-1e-05	98.4306
18	0.198905	0.301673	0.499422	1.11564	0.10181	0.404299	0.496165	0.093211	0.109983	54.8586	1.37245	41.7469	4e-06	100.299
19	0.21977	0.349905	0.430326	1.26878	0.09001	0.391515	0.484067	0.128612	0.10257	53.9175	1.48685	40.7201	0	98.59
20	0.223288	0.352384	0.424327	1.28757	0.047231	0.391211	0.466781	0.093716	0.075775	53.8424	1.52224	41.2501	0	98.977
21	0.233396	0.360276	0.406328	1.29924	0.081621	0.401004	0.518302	0.108251	0.096442	53.5507	1.5704	40.4334	0	98.0594
22	0.23171	0.350685	0.417605	1.27289	0.098604	0.415482	0.506396	0.11543	0.04031	54.3347	1.56921	40.5071	-1e-05	98.8601
23	0.228591	0.352358	0.419051	1.27627	0.071728	0.397341	0.502113	0.144634	0.120859	54.3751	1.54483	40.2769	0	98.7098
24	0.247505	0.429356	0.323139	1.55335	0.103191	0.401134	0.494245	0.134648	0.069535	53.2574	1.6707	40.4992	-1e-05	98.1834
25	0.256549	0.450536	0.292915	1.62018	0.049209	0.403687	0.500964	0.109151	0.140321	53.1923	1.72134	40.1045	0	97.8417
26	0.236902	0.380043	0.383055	1.35861	0.105004	0.384603	0.548834	0.112968	0.123304	53.6156	1.58013	39.8073	0	97.6364
27	0.233827	0.382997	0.383176	1.38519	0.043889	0.389176	0.49179	0.118589	0.118363	53.5286	1.57787	40.7019	0	98.3554
28	0.232801	0.374815	0.392384	1.37686	0.097662	0.381059	0.46584	0.122909	0.069584	54.3259	1.59559	41.3693	4e-06	99.8047
29	0.234635	0.372526	0.392839	1.35359	0.136553	0.39271	0.587456	0.123325	0.153745	53.7295	1.59069	40.8029	4e-06	98.8705
Effusive - Matrix Apatite 4 - traverse 1_1							Angle with the c-axis from EBSD			10.5
0	0.195826	0.723857	0.0803167	2.63243	0.089319	0.299878	2.66557	0.142504	0.120913	52.4827	1.32873	40.1771	4e-06	99.9392
1	0.172152	0.595434	0.232413	2.14701	0.099506	0.33797	1.3974	0.162064	0.041045	53.7153	1.15818	39.8667	0	98.9252
2	0.189638	0.675127	0.135235	2.44554	0.084243	0.360144	1.81955	0.109586	-0.00536	53.7887	1.28167	39.7362	0	99.6202
3	0.162568	0.648429	0.189002	2.35013	0.068855	0.385837	1.26309	0.13633	0.021413	54.2657	1.09933	39.8691	0	99.4598
4	0.157967	0.610056	0.231977	2.18328	0.101668	0.374974	0.947678	0.115106	0.139124	53.9466	1.0548	39.3841	0	98.2474
5	0.152046	0.666802	0.181152	2.40708	0.096371	0.381078	1.29006	0.15443	0.071322	54.1238	1.02407	39.6076	0	99.1559
6	0.134765	0.621668	0.243567	2.24727	0.194222	0.378142	0.862724	0.111351	0.046368	54.0344	0.908944	40.0656	0	98.849
7	0.133423	0.557954	0.308623	1.97528	0.16101	0.393494	1.01	0.113273	0.057076	52.3487	0.8813	39.6253	0	96.5655
8	0.130407	0.514312	0.355281	1.86527	0.159289	0.425992	0.65124	0.142271	0.128448	54.1964	0.882429	40.5415	8e-06	98.9928
9	0.142173	0.556312	0.301514	2.0115	0.099157	0.419214	0.605511	0.091737	0.066024	54.6655	0.959141	40.0381	0	98.9559
10	0.155826	0.617732	0.226442	2.21137	0.109917	0.414832	0.435897	0.112406	0.089289	54.0745	1.04079	39.5078	4e-06	97.9968
11	0.162074	0.54779	0.290136	1.96683	0.165189	0.393537	0.424242	0.137754	0.069677	54.1005	1.08575	39.8556	0	98.1991
12	0.168874	0.556963	0.274163	2.01318	0.10946	0.431818	0.762571	0.136745	0.092835	54.2775	1.13889	40.0372	4e-06	99.0002
13	0.171267	0.578056	0.250677	2.08865	0.095686	0.389869	0.452547	0.124163	0.069669	54.3418	1.1546	40.0854	0	98.8024
14	0.171172	0.551747	0.277081	1.98616	0.142332	0.406619	0.690186	0.108161	0.037484	54.1638	1.14966	39.8802	0	98.5646
15	0.17475	0.54659	0.278661	1.97326	0.107802	0.419991	0.56412	0.128311	0.04285	54.0968	1.17707	40.1609	0	98.6711
16	0.180563	0.519505	0.299932	1.88488	0.127992	0.429841	0.454778	0.105368	0.157151	54.7989	1.22232	40.2113	0	99.3925
17	0.185307	0.55337	0.261323	2.00305	0.136904	0.398529	0.402075	0.128852	0.023211	54.2852	1.2515	40.2706	0	98.8998
18	0.178417	0.497266	0.324317	1.79539	0.099764	0.36891	0.446337	0.132554	0.025004	54.651	1.2019	40.1	4e-06	98.8209
19	0.181071	0.521389	0.29754	1.88403	0.187776	0.383928	0.482209	0.142367	0.096415	53.7921	1.22078	40.431	0	98.6206
20	0.1873	0.518985	0.293715	1.86191	0.084653	0.388533	0.491144	0.120868	0.094685	54.1288	1.25373	39.8106	0	98.2349
21	0.198749	0.525707	0.275544	1.88492	0.136237	0.374989	0.447929	0.099412	0.059013	54.0727	1.32959	39.7715	4e-06	98.1763
22	0.189367	0.511756	0.298876	1.84913	0.129564	0.409993	0.585641	0.138291	0.076867	54.6566	1.27665	39.9677	4e-06	99.0904
23	0.193051	0.490241	0.316708	1.77167	0.135406	0.404293	0.490906	0.175374	0.089396	54.0864	1.30169	40.336	0	98.7912
24	0.194683	0.504746	0.300571	1.81191	0.143757	0.416729	0.50376	0.117124	0.066101	54.2125	1.30393	39.7842	0	98.3601
25	0.204395	0.505214	0.290391	1.8203	0.183903	0.411289	0.494447	0.127445	0.060748	54.318	1.37404	39.9408	0	98.7309
26	0.189783	0.515347	0.29487	1.8523	0.144271	0.41311	0.388154	0.13588	0.032164	54.5754	1.27272	39.7202	4e-06	98.5342
27	0.197095	0.514504	0.288401	1.85682	0.102565	0.481352	0.546566	0.130206	0.078583	54.2878	1.32715	40.0243	0	98.8353
28	0.195069	0.46844	0.336491	1.69577	0.253884	0.419833	0.655707	0.133104	0.076842	54.7441	1.31754	40.063	0	99.3597
29	0.200484	0.513414	0.286102	1.84975	0.118862	0.416564	0.658875	0.131152	0.125009	53.9723	1.34768	40.0437	0	98.6638
30	0.211385	0.492508	0.296108	1.76514	0.178	0.398544	0.657374	0.102041	0.05175	53.6601	1.41352	39.8892	4e-06	98.1157
31	0.21855	0.478942	0.302508	1.72478	0.160461	0.463366	0.894211	0.117011	0.117762	53.9197	1.46847	39.9466	0	98.8124
32	0.212054	0.474651	0.313295	1.69866	0.067975	0.421296	0.865711	0.116606	0.049991	54.0349	1.41593	39.5933	4e-06	98.2644
33	0.216687	0.462187	0.321126	1.66284	0.197895	0.5405	1.01158	0.119219	0.07306	53.6326	1.45455	39.9694	0	98.6617
34	0.216902	0.445433	0.337665	1.59164	0.104651	0.408085	0.678536	0.09636	0.060654	54.1062	1.44607	39.5898	0	98.082
35	0.206914	0.466093	0.326993	1.67494	0.148488	0.387865	0.669211	0.132845	0.033882	53.7533	1.38733	40.1149	4e-06	98.3027
36	0.220752	0.440258	0.338989	1.57917	0.156308	0.41073	0.712242	0.138436	0.030299	53.9955	1.47737	39.8604	0	98.3605
37	0.196371	0.481226	0.322404	1.72763	0.164738	0.416409	0.582018	0.130891	0.076644	54.0004	1.31535	39.9076	0	98.3217
38	0.205864	0.463374	0.330762	1.66659	0.159449	0.40846	0.566507	0.118774	0.060617	54.1405	1.38147	40.0068	0	98.5092
39	0.21363	0.46098	0.32539	1.65637	0.156244	0.410773	0.695538	0.131761	0.023147	53.7676	1.43219	40.0684	4e-06	98.3421
40	0.209155	0.457399	0.333445	1.63755	0.117512	0.406779	0.743679	0.110765	0.147913	54.2686	1.39711	39.5676	0	98.3975
41	0.208102	0.456176	0.335721	1.63274	0.159156	0.423361	0.783372	0.135532	0.005343	53.6893	1.38971	39.8297	4e-06	98.0482
42	0.211204	0.453671	0.335125	1.64358	0.151817	0.509225	1.09459	0.147191	0.017801	53.8917	1.42763	40.364	0	99.2476
43	0.213487	0.468071	0.318442	1.6767	0.155243	0.496708	1.11154	0.128891	0.039159	53.3733	1.42685	39.8139	0	98.2223
44	0.231939	0.440868	0.327193	1.57532	0.119893	0.472918	0.966283	0.132808	0.02317	53.5219	1.54631	39.6861	8e-06	98.0447
45	0.233125	0.45079	0.316085	1.61375	0.152689	0.384326	0.774888	0.107899	0.062326	53.8552	1.55709	39.7354	0	98.2435
46	0.217026	0.444472	0.338502	1.59598	0.126281	0.439391	0.834655	0.104171	0.044524	53.955	1.45398	39.9071	0	98.4611
47	0.219526	0.446604	0.33387	1.60379	0.208925	0.388092	0.679202	0.140517	0.044503	54.3351	1.47087	39.754	4e-06	98.625
48	0.219783	0.45761	0.322608	1.64181	0.147106	0.44319	0.837622	0.096741	0.101554	53.74	1.47124	39.8925	0	98.3717
49	0.218892	0.39929	0.381818	1.43303	0.164109	0.418692	0.565752	0.137302	0.001771	53.7519	1.46575	40.1935	0	98.1318
50	0.213456	0.443172	0.343372	1.5937	0.144963	0.409204	0.835451	0.139246	0.078381	53.8651	1.43221	40.0573	-1e-05	98.5556
51	0.212894	0.447875	0.339231	1.60312	0.140293	0.432367	0.731436	0.137783	0.060551	54.228	1.42179	39.5779	0	98.3333
52	0.226209	0.424375	0.349416	1.50885	0.132013	0.462243	0.939696	0.124315	0.05523	53.8483	1.50061	39.2514	0	97.8226
53	0.22358	0.4416	0.334821	1.58235	0.142336	0.465114	0.862145	0.121929	0.016026	53.4841	1.49475	39.9574	0	98.1262
54	0.218343	0.444041	0.337615	1.59007	0.122896	0.438223	0.364407	0.105163	0.096263	54.2587	1.4588	39.7393	0	98.1739
55	0.217849	0.454998	0.327153	1.63296	0.131008	0.330153	0.30702	0.087523	0.03213	54.6346	1.45876	39.7918	8e-06	98.406
56	0.220919	0.4621	0.31698	1.63457	0.150924	0.486749	0.357121	0.128553	-0.00536	53.8949	1.45802	39.0157	0	97.1211
57	0.23019	0.455009	0.314802	1.59839	0.220895	0.621486	0.399585	0.109145	0.001785	53.5488	1.50873	38.5862	0	96.5951
58	0.237662	0.439085	0.323253	1.56938	0.153705	0.41472	0.281172	0.121217	0.064257	54.2861	1.5849	39.5975	0	98.073
59	0.245314	0.439626	0.31506	1.57998	0.127324	0.334441	0.409594	0.146539	0.092848	54.0568	1.64495	40.0648	4e-06	98.4573
60	0.244166	0.444655	0.31118	1.5932	0.191286	0.347851	0.433352	0.119763	0.041036	54.0806	1.63228	39.812	4e-06	98.2514
61	0.228958	0.42637	0.344672	1.53816	0.183427	0.391486	0.887696	0.145614	0.037487	54.1278	1.54111	40.1268	0	98.9796
62	0.230872	0.474392	0.294736	1.7004	0.115293	0.402183	1.06123	0.134669	0.042773	53.4912	1.544	39.8343	0	98.326
63	0.232796	0.445657	0.321547	1.60798	0.130586	0.39755	0.956093	0.13103	0.078498	54.1686	1.56718	40.0422	0	99.0797
64	0.231562	0.463909	0.30453	1.6727	0.165133	0.399147	0.774651	0.113721	0.046377	54.0346	1.55781	40.0879	0	98.8521
65	0.22284	0.410194	0.366966	1.46257	0.156964	0.365933	0.594169	0.132509	0.04107	54.2947	1.48246	39.4566	0	97.987
66	0.222388	0.434264	0.343348	1.55743	0.17305	0.313352	0.423272	0.117582	0.103631	54.4282	1.48809	39.8071	4e-06	98.4117
67	0.214921	0.474203	0.310876	1.69023	0.123597	0.345835	0.404241	0.114704	0.060716	54.2325	1.4293	39.4226	0	97.8236
68	0.217688	0.532719	0.249594	1.89976	0.138114	0.425802	0.86698	0.117547	-1e-05	53.7313	1.44843	39.3159	0	97.9438
69	0.212867	0.523287	0.263846	1.88554	0.121191	0.464282	1.25294	0.111127	0.044674	53.957	1.43109	39.759	4e-06	99.0268
70				Analytical error - low total
71	0.200503	0.396133	0.403364	1.21775	0.130387	0.436525	0.873126	0.124292	0.082244	54.6395	1.19411	41.2417	0	99.9397
72	0.207048	0.439753	0.353199	1.43934	0.110572	0.444988	1.16654	0.149347	0.096336	53.5488	1.35927	40.9385	0	99.2537
73	0.226237	0.488009	0.285753	1.58311	0.1567	0.497425	0.983833	0.132157	0.046448	53.5375	1.39071	40.2079	0	98.5357
74	0.225798	0.453379	0.320823	1.76799	0.139518	0.47288	1.28569	0.139984	0.01961	53.48	1.52925	40.3972	0	99.2321
75	0.212529	0.46572	0.321751	1.62162	0.14326	0.498177	1.44425	0.163849	0.041026	53.5941	1.50685	39.4647	0	98.4778
76	0.222708	0.457578	0.319714	1.68493	0.16543	0.471086	1.40339	0.133405	0.103458	53.6996	1.43462	40.2134	8e-06	99.3093
77	0.215186	0.448375	0.336439	1.63589	0.106298	0.457254	1.28369	0.128306	0.062461	53.5046	1.48555	39.5939	0	98.2578
78	0.216554	0.442588	0.340859	1.62377	0.124607	0.471754	1.35181	0.10023	0.099947	53.6467	1.45398	40.3999	4e-06	99.2727
79	0.232972	0.47779	0.289238	1.59366	0.137855	0.465739	1.22385	0.140971	0.078535	53.45	1.45487	40.158	4e-06	98.7035
80	0.226503	0.461695	0.311802	1.70052	0.124191	0.48365	1.50782	0.1436	0.078427	52.8851	1.54707	39.3988	0	97.8692
Effusive - Matrix Apatite 4 - traverse 1_2							Angle with the c-axis from EBSD			10.5
0	0.208124	0.701976	0.0899004	2.44807	0.077909	0.29198	1.66345	0.129208	0.035528	51.9258	1.35421	38.1214	0	96.0475
1	0.198401	0.626804	0.174795	2.21831	0.099061	0.31721	1.5678	0.123597	0.106616	52.5226	1.31008	39.0066	4e-06	97.2719
2	0.184193	0.627451	0.188357	2.25053	0.063076	0.339057	1.39726	0.132428	0.07817	53.2203	1.23265	39.6592	0	98.3727
3	0.183311	0.569378	0.247311	2.06488	0.170565	0.359145	1.99169	0.130551	0.074569	53.2932	1.24035	40.2338	0	99.5588
4	0.179779	0.543322	0.276899	1.95501	0.074448	0.375538	1.72395	0.157977	0.134909	53.384	1.20696	39.8452	-1e-05	98.858
5	0.239407	0.742516	0.0180766	2.63256	0.111483	0.34334	1.40211	0.153117	0.148954	52.9859	1.5837	38.4955	4e-06	97.8566
6	0.196928	0.609014	0.194058	2.18354	0.095179	0.379181	1.67501	0.119202	0.083364	52.7488	1.31736	39.7378	0	98.3395
7	0.186858	0.522278	0.290865	1.89985	0.149775	0.352639	1.10986	0.1333	0.094141	54.1694	1.26821	40.4738	4e-06	99.651
8	0.190599	0.519468	0.289934	1.86792	0.064709	0.34741	0.954215	0.111781	0.08344	53.5763	1.27874	40.0975	4e-06	98.3821
9	0.187412	0.519645	0.292943	1.87273	0.075065	0.364491	0.961049	0.115173	0.13864	53.7738	1.26017	40.1222	0	98.6833
10	0.188195	0.576211	0.235595	2.07437	0.086619	0.416842	1.41663	0.134161	0.033715	53.3229	1.26408	39.921	0	98.6702
11	0.180274	0.504228	0.315498	1.82565	0.043679	0.408163	0.926008	0.123559	-1e-05	54.2034	1.21783	40.3136	0	99.0619
12	0.185954	0.487675	0.326371	1.76456	0.057259	0.484141	0.872996	0.147175	0.13848	53.9477	1.25538	40.3434	4e-06	99.0111
13	0.180912	0.474537	0.344551	1.70949	0.069011	0.421007	0.748633	0.121169	0.051532	54.1107	1.21598	40.1307	4e-06	98.5781
14	0.181691	0.496068	0.322241	1.79459	0.083996	0.42531	0.824759	0.138799	0.110095	54.2996	1.22637	40.2002	0	99.1036
15	0.185737	0.480124	0.334138	1.74013	0.078066	0.407567	0.717954	0.146252	0.152723	54.4861	1.256	40.3081	4e-06	99.2928
16	0.186831	0.476936	0.336233	1.72454	0.060215	0.442709	0.693015	0.130413	0.10301	54.6627	1.26045	40.0768	4e-06	99.1539
17	0.179828	0.507946	0.312226	1.8309	0.070009	0.445753	0.608198	0.131861	0.092371	53.9102	1.20939	40.2072	0	98.5059
18	0.183666	0.493918	0.322417	1.77944	0.116474	0.512078	0.74185	0.124459	0.030205	54.3783	1.23458	39.8617	4e-06	98.7791
19	0.185927	0.559961	0.254112	2.0217	0.129133	0.468652	0.827033	0.155206	0.120808	53.8472	1.25246	40.0478	0	98.8701
20	0.195822	0.522546	0.281632	1.88701	0.138051	0.475478	0.669259	0.100704	0.024881	54.0334	1.31939	40.1421	0	98.7903
21	0.203915	0.486335	0.309751	1.75337	0.12074	0.412146	0.686867	0.10254	-0.00534	54.1757	1.37167	40.0869	0	98.7046
22	0.185512	0.484215	0.330274	1.74826	0.075404	0.454609	0.863229	0.120182	0.0355	53.9416	1.24969	40.2632	0	98.7516
23	0.201468	0.473251	0.325282	1.72924	0.097714	0.580038	0.872426	0.130544	0.090635	54.4306	1.37351	40.7037	0	100.008
24	0.186307	0.471061	0.342632	1.7145	0.110729	0.403728	0.583709	0.120755	0.049758	53.9994	1.26518	40.9453	4e-06	99.193
25	0.190124	0.469115	0.340761	1.70777	0.106171	0.377292	0.529307	0.146802	0.033754	54.351	1.29137	40.8124	0	99.3559
26	0.190551	0.489396	0.320053	1.75537	0.091104	0.374849	0.503566	0.129692	-0.00357	54.146	1.27521	39.8813	0	98.1535
27	0.192334	0.50424	0.303426	1.82076	0.076012	0.345113	0.404892	0.123601	0.092501	54.7599	1.29579	40.0258	0	98.9443
28	0.189278	0.43869	0.372032	1.58568	0.116339	0.330344	0.346957	0.115269	0.069416	54.5724	1.2765	40.3996	0	98.8124
29	0.187917	0.463799	0.348284	1.67994	0.120296	0.361923	0.452567	0.097901	0.087116	54.5959	1.26997	40.4032	4e-06	99.0688
30	0.176513	0.428545	0.394942	1.57326	0.078957	0.369378	0.553294	0.126812	0.110208	54.666	1.20905	41.3806	0	100.068
31	0.163353	0.467461	0.369186	1.68661	0.116096	0.378846	0.553228	0.122579	0.078189	53.7761	1.09966	40.55	0	98.3613
32	0.15049	0.556537	0.292973	2.01599	0.111109	0.391176	0.73381	0.15754	0.065729	53.9928	1.0171	40.4177	0	98.9029
33	0.163219	0.533815	0.302966	1.94479	0.105921	0.449156	0.739416	0.11987	0.030225	54.1369	1.10947	40.7488	4e-06	99.3845
34	0.182523	0.513457	0.304021	1.86891	0.130915	0.415799	0.650357	0.089548	0.135141	54.3256	1.23955	40.6253	0	99.4811
35	0.197409	0.469822	0.332769	1.71318	0.126681	0.435087	0.659507	0.111869	0.165275	54.4082	1.34307	40.7542	0	99.717
36	0.192793	0.461953	0.345254	1.68386	0.119926	0.434015	0.491378	0.094249	0.087186	54.5848	1.31118	40.7708	0	99.5774
37	0.189256	0.459395	0.351348	1.66261	0.149852	0.417753	0.430253	0.112051	0.128185	54.3068	1.27796	40.4406	0	98.926
38	0.192934	0.462167	0.344899	1.66373	0.046369	0.396394	0.45076	0.139935	0.019565	54.5579	1.29585	40.0023	0	98.5727
39	0.21043	0.452199	0.337371	1.62269	0.133649	0.410612	0.407164	0.133939	0.033816	54.2049	1.40889	39.9109	0	98.2666
40	0.195577	0.455604	0.348819	1.64196	0.08512	0.409108	0.627064	0.101647	0.119106	54.0203	1.31509	40.2553	0	98.5746
41	0.205211	0.460856	0.333933	1.6566	0.132152	0.392145	0.512229	0.124523	0.094253	53.9365	1.37631	40.1146	0	98.3393
42	0.201036	0.468706	0.330258	1.6994	0.142018	0.39993	0.544204	0.119943	0.08186	54.364	1.35998	40.4595	4e-06	99.1708
43	0.204491	0.473597	0.321912	1.69998	0.14539	0.399112	0.467973	0.127835	0.055154	53.8701	1.36953	40.0346	0	98.1697
44	0.19901	0.474501	0.326488	1.70989	0.105531	0.385701	0.487505	0.141993	0.055216	54.2287	1.33804	40.1454	0	98.598
45	0.196187	0.451439	0.352375	1.62901	0.255873	0.432815	0.448019	0.127394	0.081848	53.9445	1.32086	40.3649	4e-06	98.6052
46	0.202699	0.461359	0.335942	1.66467	0.118204	0.406536	0.45836	0.1232	0.080083	54.1998	1.36459	40.2653	0	98.6808
47	0.196199	0.464847	0.338953	1.67261	0.094424	0.420119	0.59662	0.112573	0.02671	53.8029	1.31718	40.25	4e-06	98.2931
48	0.212592	0.462366	0.325043	1.67231	0.151707	0.429584	0.701704	0.140947	0.024896	53.9431	1.43463	40.4094	0	98.9083
49	0.200699	0.453481	0.34582	1.63162	0.131182	0.424018	0.694656	0.119528	0.097919	54.0814	1.34731	40.044	0	98.5717
50	0.199365	0.480547	0.320088	1.74026	0.150584	0.440583	0.851445	0.087784	0.083658	54.039	1.34707	40.3733	4e-06	99.1137
51	0.209327	0.477829	0.312844	1.73023	0.117393	0.444512	0.783877	0.143871	0.044514	54.1459	1.41423	40.3191	0	99.1436
52	0.198551	0.451222	0.350227	1.63159	0.169197	0.425631	0.566118	0.127953	0.07301	54.2644	1.33954	40.3385	0	98.9359
53	0.205531	0.437944	0.356525	1.58062	0.118301	0.423102	0.779161	0.098141	0.042761	54.1175	1.38404	40.2626	0	98.8063
54	0.211808	0.464828	0.323364	1.67352	0.157738	0.422964	0.834193	0.113548	0.064134	54.2621	1.4228	39.8805	8e-06	98.8315
55	0.21592	0.454485	0.329595	1.62931	0.136743	0.422261	0.764556	0.098718	0.123088	54.2887	1.44424	39.6218	0	98.5294
56	0.216535	0.455471	0.327994	1.6423	0.143441	0.390789	0.813979	0.105232	0.02318	54.0728	1.45674	40.1424	0	98.7908
57	0.221674	0.454456	0.32387	1.63568	0.109921	0.433363	0.874166	0.125678	0.179882	53.7891	1.48862	40.0645	0	98.7008
58	0.210588	0.458135	0.331277	1.64923	0.163865	0.4615	0.98194	0.151999	0.064187	53.8459	1.41444	40.0008	0	98.7339
59	0.20479	0.448344	0.346866	1.61549	0.168888	0.412452	0.86243	0.105769	0.032108	53.9029	1.37678	40.1837	4e-06	98.6605
60	0.231959	0.492004	0.276037	1.75847	0.142522	0.463757	1.36091	0.133171	0.065893	53.5443	1.54682	39.3836	4e-06	98.3994
61	0.198531	0.454203	0.347266	1.64436	0.151251	0.415308	0.812571	0.115585	0.06065	53.7812	1.34103	40.5843	0	98.9062
62	0.221725	0.443161	0.335114	1.5928	0.151973	0.456864	1.22814	0.166442	0.090876	53.6954	1.48688	39.8781	4e-06	98.7475
63	0.211592	0.425415	0.362993	1.5453	0.207735	0.437269	0.868161	0.131586	0.062469	53.9722	1.43404	40.6899	0	99.3486
64	0.216405	0.427648	0.355948	1.5355	0.11894	0.445804	1.00249	0.138976	0.037454	53.8003	1.44975	39.9496	0	98.4788
65	0.226503	0.461695	0.311802	1.64941	0.131149	0.494998	1.45521	0.136529	0.06948	53.125	1.50977	39.6051	0	98.1766
66	0.232972	0.47779	0.289238	1.70052	0.124191	0.48365	1.50782	0.1436	0.078427	52.8851	1.54707	39.3988	0	97.8692
67	0.216554	0.442588	0.340859	1.59366	0.137855	0.465739	1.22385	0.140971	0.078535	53.45	1.45487	40.158	4e-06	98.7035
68	0.215186	0.448375	0.336439	1.62377	0.124607	0.471754	1.35181	0.10023	0.099947	53.6467	1.45398	40.3999	4e-06	99.2727
69	0.222708	0.457578	0.319714	1.63589	0.106298	0.457254	1.28369	0.128306	0.062461	53.5046	1.48555	39.5939	0	98.2578
70	0.212529	0.46572	0.321751	1.68493	0.16543	0.471086	1.40339	0.133405	0.103458	53.6996	1.43462	40.2134	8e-06	99.3093
71	0.225798	0.453379	0.320823	1.62162	0.14326	0.498177	1.44425	0.163849	0.041026	53.5941	1.50685	39.4647	0	98.4778
72	0.226237	0.488009	0.285753	1.76799	0.139518	0.47288	1.28569	0.139984	0.01961	53.48	1.52925	40.3972	0	99.2321
73	0.207048	0.439753	0.353199	1.58311	0.1567	0.497425	0.983833	0.132157	0.046448	53.5375	1.39071	40.2079	0	98.5357
74	0.200503	0.396133	0.403364	1.43934	0.110572	0.444988	1.16654	0.149347	0.096336	53.5488	1.35927	40.9385	0	99.2537
75	0.174908	0.332803	0.492289	1.21775	0.130387	0.436525	0.873126	0.124292	0.082244	54.6395	1.19411	41.2417	0	99.9397
Effusive - Matrix Apatite 6 - traverse 3_1							Angle with the c-axis from EBSD			12.3
0	0.204074	0.656376	0.139549	2.35679	0.095569	0.297166	1.80096	0.131383	0.064343	52.9259	1.36716	39.6084	0	98.6477
1	0.202717	0.665703	0.13158	2.40504	0.083098	0.294082	1.4327	0.135632	0.101924	53.5979	1.36645	39.8051	4e-06	99.2219
2	0.204422	0.645997	0.149581	2.32333	0.069032	0.317857	1.18784	0.145491	0.037557	54.4042	1.37174	39.2389	0	99.096
3	0.17338	0.605596	0.221024	2.19737	0.122835	0.352183	1.34756	0.111214	0.026812	53.8161	1.17377	40.2349	0	99.3827
4	0.163689	0.626544	0.209766	2.29266	0.077483	0.365366	1.06421	0.112152	0.08585	54.4752	1.11756	40.558	4e-06	100.149
5	0.175637	0.627313	0.19705	2.26601	0.147278	0.376073	1.01827	0.120167	0.082309	54.3318	1.18374	39.6881	0	99.2138
6	0.171643	0.607498	0.220859	2.22488	0.065757	0.374952	0.8641	0.128728	0.0573	54.897	1.17287	40.5126	0	100.298
7	0.164255	0.587091	0.248654	2.13057	0.08578	0.388564	0.650094	0.118865	0.173721	53.9753	1.11217	40.466	0	99.101
8	0.193025	0.581318	0.225657	2.09469	0.109464	0.418666	0.803318	0.145968	0.11809	54.3155	1.29772	39.6584	0	98.9618
9	0.192827	0.615593	0.191579	2.20996	0.148222	0.443578	1.15161	0.134777	0.032204	53.6357	1.29158	39.5129	8e-06	98.5606
10	0.189468	0.53484	0.275692	1.9213	0.138321	0.411497	0.812344	0.147546	0.100324	54.4468	1.2699	39.5101	0	98.7581
11	0.186605	0.530707	0.282688	1.91685	0.148214	0.370507	0.39128	0.128235	0.04836	54.4784	1.25753	40.0948	-1e-05	98.8342
12	0.195953	0.492417	0.31163	1.77436	0.046634	0.377009	0.352772	0.121713	0.100363	54.3954	1.31742	40.1003	0	98.586
13	0.195318	0.530969	0.273713	1.92486	0.131772	0.397801	0.437723	0.131651	0.048405	54.7667	1.3211	40.1445	0	99.3045
14	0.20747	0.532823	0.259706	1.9268	0.137268	0.379572	0.315804	0.102438	0.059148	55.0283	1.39982	39.8721	0	99.2212
15	0.195299	0.489012	0.315689	1.775	0.162477	0.42311	0.531738	0.139134	0.048393	54.9577	1.32264	40.1761	4e-06	99.5362
16	0.203865	0.523577	0.272557	1.8729	0.089248	0.415248	0.371469	0.169142	0.078845	54.5083	1.36063	39.3752	0	98.241
17	0.216737	0.529553	0.25371	1.90946	0.124311	0.411527	0.6169	0.131144	0.064535	54.9413	1.45813	39.5551	0	99.2124
18	0.206598	0.505285	0.288117	1.83535	0.059444	0.428004	0.685839	0.128712	0.109251	54.5656	1.40014	40.3191	0	99.5314
19	0.21012	0.490983	0.298897	1.78512	0.107368	0.420058	0.687492	0.157903	0.048373	54.3568	1.42538	40.5073	0	99.4958
20	0.206934	0.49849	0.294575	1.80081	0.158137	0.452199	1.09683	0.145036	0.100171	53.6618	1.39478	40.1915	0	99.0013
21	0.220736	0.513311	0.265953	1.87312	0.083473	0.466441	1.42264	0.142683	0.062595	54.0774	1.50287	40.5002	4e-06	100.131
22	0.217486	0.495971	0.286543	1.79785	0.109245	0.429526	0.999532	0.10949	0.03224	53.8062	1.47093	40.4393	0	99.1943
23	0.243677	0.48372	0.272603	1.73219	0.164052	0.50848	2.0299	0.14572	0.092801	53.5053	1.62809	39.2064	0	99.0129
24	0.217959	0.486991	0.29505	1.76464	0.139732	0.39496	0.429948	0.1274	0.084254	54.519	1.47358	40.2908	0	99.2242
25	0.223365	0.49168	0.284955	1.76829	0.140806	0.402546	0.339232	0.142353	0.09496	54.5053	1.49882	39.7791	4e-06	98.6713
26	0.216282	0.480104	0.303614	1.73061	0.155708	0.396036	0.360208	0.131935	0.132495	54.1984	1.45461	40.124	0	98.684
27	0.209172	0.500745	0.290083	1.82007	0.095614	0.38617	0.338436	0.140566	0.05916	54.4734	1.41853	40.5752	0	99.3071
28	0.178448	0.462544	0.359007	1.62433	0.186309	0.305891	0.311995	0.14324	0.066279	53.6907	1.16922	38.8509	0	96.3488
29	0.166864	0.378772	0.454363	1.36533	0.213799	0.4004	0.324607	0.099144	0.087806	54.0333	1.12224	40.622	4e-06	98.2686
30	0.188259	0.390798	0.420943	1.42384	0.10188	0.388914	0.274562	0.099081	0.130742	54.4964	1.27976	41.1024	0	99.2976
31	0.214684	0.458343	0.326973	1.65327	0.118708	0.372244	0.310041	0.130987	0.093108	54.1893	1.44483	40.3012	4e-06	98.6137
32	0.231289	0.44817	0.320541	1.61156	0.103129	0.402383	0.387479	0.133279	0.082328	54.2995	1.55175	39.9736	0	98.545
33	0.211362	0.485587	0.303051	1.76575	0.099533	0.425298	0.629882	0.116433	0.060856	54.6022	1.43401	40.4401	0	99.574
34	0.246216	0.483702	0.270082	1.73788	0.174265	0.378687	0.636124	0.130494	0.107372	53.0152	1.65052	40.3121	4e-06	98.1427
35	0.145302	0.311574	0.543124	1.13503	0.163581	0.431739	0.927625	0.13837	0.128745	54.6671	0.987599	41.0069	0	99.5867
36	0.179465	0.256163	0.564372	0.9265	0.175276	0.449165	1.16965	0.15338	0.051852	54.4327	1.21108	40.5865	4e-06	99.1561
37	0.231268	0.422179	0.346553	1.52073	0.21854	0.477475	1.21198	0.129919	0.042902	54.1316	1.5543	39.8265	0	99.1139
38	0.235595	0.481233	0.283172	1.73723	0.115471	0.537476	1.44425	0.152247	0.105315	53.5915	1.58683	39.9658	0	99.2361
39	0.233111	0.493514	0.273375	1.78844	0.12246	0.506301	1.2851	0.128401	0.053569	53.8973	1.57616	40.1522	8e-06	99.5099
40	0.238201	0.453916	0.307883	1.64197	0.132825	0.485791	0.97312	0.135494	0.066123	54.0288	1.60767	40.1822	0	99.254
41	0.226899	0.473235	0.299865	1.71437	0.105351	0.445007	0.742983	0.11019	0.060779	54.0636	1.53364	40.3871	0	99.1631
42	0.222661	0.452385	0.324954	1.62623	0.087057	0.42311	0.612873	0.138864	0.082293	54.2175	1.49342	39.9081	0	98.5894
43	0.2209	0.48449	0.29461	1.73585	0.157229	0.428202	0.552466	0.09806	0.017894	53.821	1.47668	39.8226	0	98.11
44	0.227674	0.456436	0.31589	1.64695	0.176602	0.369631	0.284715	0.113793	0.077116	54.4858	1.53277	40.1407	0	98.828
45	0.257443	0.514505	0.228052	1.84613	0.115861	0.373963	0.328922	0.131958	0.11956	53.8436	1.72352	39.8389	0	98.3225
Effusive - Matrix Apatite 6 - traverse 3_2							Angle with the c-axis from EBSD			12.3
0	0.190367	0.637849	0.171783	2.28522	0.090668	0.318208	1.74404	0.131121	0.069573	53.1804	1.27252	39.4259	0	98.5177
1	0.178552	0.641873	0.179575	2.24389	0.073696	0.334416	1.45091	0.126508	0.089266	52.1408	1.16461	38.4483	0	96.0724
2	0.183101	0.628178	0.188721	2.26516	0.100686	0.362678	1.55152	0.113322	0.057075	53.7074	1.23188	39.692	4e-06	99.0817
3	0.182783	0.623232	0.193984	2.23456	0.071878	0.361411	1.42029	0.132569	0.112459	53.8064	1.22276	39.3144	4e-06	98.6767
4	0.168545	0.613685	0.21777	2.23036	0.107571	0.384429	1.8016	0.118103	0.128528	53.6397	1.1429	40.2028	0	99.756
5	0.162698	0.594794	0.242508	2.15688	0.048748	0.387294	1.53778	0.125989	0.13916	53.4623	1.10079	40.3301	0	99.2889
6	0.171028	0.728025	0.100946	2.64318	0.102125	0.362432	1.17975	0.147511	0.02497	53.7307	1.15854	40.0479	0	99.3972
7	0.166808	0.601852	0.23134	2.18314	0.162154	0.353868	0.875882	0.114847	0.134017	54.2967	1.12894	40.1372	0	99.3867
8	0.174256	0.561489	0.264254	2.03317	0.136195	0.390801	1.24432	0.137707	0.073169	53.6909	1.17729	40.2604	0	99.1439
9	0.17196	0.584069	0.243971	2.11223	0.126495	0.386439	1.0516	0.134469	0.078568	54.1247	1.16029	39.9822	0	99.1571
10	0.170013	0.602715	0.227272	2.17804	0.138665	0.383056	0.700651	0.151398	0.042881	54.0693	1.1463	40.0524	0	98.8627
11	0.169151	0.574038	0.25681	2.09198	0.137636	0.384248	0.621788	0.141567	0.105438	54.5801	1.15015	40.4696	0	99.6826
12	0.169304	0.575728	0.254968	2.09603	0.16116	0.41394	0.912646	0.147219	0.078625	54.0673	1.15003	40.5132	0	99.5402
13	0.172302	0.520205	0.307493	1.87595	0.066574	0.394477	0.757592	0.1252	0.028594	54.2207	1.15931	40.0665	0	98.695
14	0.188103	0.560084	0.251813	2.02452	0.067052	0.449948	1.19509	0.136273	0.105304	54.0139	1.26861	39.945	0	99.2057
15	0.165163	0.554767	0.280069	2.00761	0.142566	0.404526	0.650375	0.155209	0.007139	53.8629	1.11518	40.4068	0	98.7523
16	0.161373	0.543156	0.295471	1.97938	0.111059	0.396347	0.531896	0.133202	-0.02146	54.2279	1.09723	40.8267	0	99.2822
17	0.162808	0.662771	0.17442	2.40804	0.174719	0.421828	0.752339	0.110542	0.046409	53.962	1.10367	40.2834	0	99.263
18	0.161673	0.575492	0.262834	2.09084	0.133916	0.382345	0.607472	0.143925	0.11616	54.0237	1.09593	40.5615	0	99.1558
19	0.173446	0.554048	0.272506	2.01026	0.144549	0.416536	0.596677	0.101137	0.057133	54.6762	1.17417	40.1742	0	99.3509
20	0.178024	0.583627	0.238349	2.10697	0.142731	0.422478	0.57946	0.147602	0.09288	53.663	1.19912	40.2272	4e-06	98.5814
21	0.185825	0.573966	0.240208	2.08239	0.145227	0.387355	0.46074	0.148121	0.066121	54.5556	1.25789	40.1959	4e-06	99.2993
22	0.184892	0.59865	0.216459	2.14556	0.136997	0.40372	0.542047	0.116567	0.074974	54.1127	1.23637	39.496	0	98.2649
23	0.187516	0.547817	0.264667	1.97594	0.162699	0.408587	0.604469	0.124922	0.133802	54.2684	1.26194	39.9206	0	98.8613
24	0.178342	0.553805	0.267853	1.99336	0.187166	0.438183	0.498095	0.11419	0.046391	54.0262	1.19769	39.9464	0	98.4477
25	0.18124	0.518696	0.300064	1.85256	0.167475	0.377995	0.349966	0.136695	0.132115	54.1338	1.20775	39.5315	4e-06	97.8899
26	0.172436	0.470928	0.356636	1.69772	0.169346	0.393588	0.324868	0.134845	0.032142	54.2162	1.15985	40.2996	0	98.4281
27	0.194696	0.57461	0.230694	2.06658	0.168907	0.400676	0.41277	0.154373	0.05173	54.2457	1.30647	39.7318	0	98.539
28	0.189485	0.515674	0.294841	1.85752	0.096012	0.410217	0.467898	0.112347	0.080321	54.2723	1.27349	40.0113	0	98.5815
29	0.191602	0.506573	0.301825	1.83117	0.099401	0.419742	0.386016	0.130588	0.13745	54.5684	1.29226	40.1222	0	98.9872
30	0.212129	0.524555	0.263316	1.87198	0.19424	0.393857	0.517855	0.124359	0.117674	53.9762	1.41245	39.3779	0	97.9865
31	0.219631	0.59921	0.18116	2.16418	0.13139	0.480288	1.42481	0.14747	0.042667	53.3901	1.48003	39.8847	0	99.1456
32	0.206165	0.529887	0.263949	1.91279	0.086183	0.453956	0.921436	0.151584	0.00891	53.9687	1.38855	40.0243	0	98.9164
33	0.196739	0.545661	0.2576	1.98102	0.169498	0.435467	0.861022	0.129453	0.042737	53.5816	1.33266	40.5923	-1e-05	99.1258
34	0.194788	0.512959	0.292252	1.85663	0.107103	0.425704	0.6217	0.13718	0.066034	54.2639	1.31543	40.253	4e-06	99.0467
35	0.197267	0.484365	0.318368	1.73907	0.140614	0.410038	0.57044	0.136011	0.110489	53.9746	1.32148	39.9257	4e-06	98.3285
36	0.188475	0.528946	0.282579	1.91594	0.144245	0.403915	0.621398	0.138427	0.121232	54.0702	1.27376	40.3602	0	99.0493
37	0.19828	0.514341	0.287379	1.84956	0.168811	0.43057	0.56877	0.123429	0.155073	53.5248	1.33033	40.1423	0	98.2936
38	0.200151	0.510916	0.288932	1.8381	0.220722	0.412471	0.509518	0.130088	0.023191	54.3126	1.34351	39.8232	0	98.6135
39	0.196937	0.50027	0.302793	1.81317	0.129671	0.423408	0.604547	0.117393	0.114135	54.4615	1.33175	40.2682	4e-06	99.2638
40	0.217276	0.483566	0.299158	1.74581	0.142942	0.40939	0.586672	0.164765	0.083884	54.2027	1.46358	40.1227	0	98.9225
41	0.203865	0.466293	0.329841	1.67174	0.150583	0.405067	0.563327	0.162816	-2e-05	54.1033	1.36369	39.8118	4e-06	98.2322
42	0.223121	0.521367	0.255512	1.88965	0.142085	0.484265	0.938056	0.13186	0.065948	54.3678	1.50883	40.0146	-1e-05	99.5431
43	0.223306	0.512945	0.263749	1.85202	0.247691	0.456598	0.775647	0.146804	0.162187	53.9142	1.50431	40.0094	0	99.0689
44	0.221406	0.493655	0.28494	1.76778	0.115224	0.438649	0.779761	0.103321	0.008908	53.7282	1.4793	39.7313	4e-06	98.1525
45	0.211134	0.52305	0.265817	1.88728	0.166676	0.425873	0.448131	0.086552	0.071368	54.4201	1.42139	39.9506	0	98.878
46	0.211876	0.465479	0.322645	1.68667	0.16818	0.390025	0.368692	0.124525	0.089258	54.3359	1.43243	40.4718	0	99.0675
47	0.21864	0.445065	0.336295	1.61211	0.146317	0.399457	0.378047	0.133873	0.037488	54.3167	1.47762	40.5027	0	99.0043
48	0.232994	0.513717	0.25329	1.83833	0.12516	0.460693	1.11726	0.133103	0.078328	53.812	1.55563	39.3734	0	98.4938
49	0.239935	0.502751	0.257315	1.80637	0.225841	0.498509	1.11562	0.16078	0.05878	53.6897	1.60846	39.6413	4e-06	98.8054
50	0.216846	0.472461	0.310694	1.70294	0.148643	0.476279	0.935415	0.158927	0.02673	53.9143	1.4583	40.0183	8e-06	98.8398
51	0.200181	0.454872	0.344948	1.64924	0.181414	0.442433	0.623726	0.144	0.103387	54.2445	1.35419	40.4651	0	99.2079
52	0.216766	0.409314	0.373921	1.45285	0.143919	0.409714	0.458465	0.140316	0.048155	53.7372	1.43555	39.4764	4e-06	97.3026
53	0.231184	0.49402	0.274796	1.78245	0.140191	0.411369	0.509167	0.167944	0.121296	54.2679	1.5563	40.0013	0	98.958
54	0.224342	0.468094	0.307565	1.67996	0.127119	0.410652	0.572771	0.154347	0.092743	54.1963	1.50224	39.7588	0	98.495
55	0.218927	0.49648	0.284593	1.78513	0.153376	0.394272	0.443394	0.144543	0.085622	54.1414	1.46869	39.9067	0	98.5231
56	0.213061	0.44054	0.346399	1.58794	0.189974	0.420517	0.475748	0.132888	0.073168	54.6197	1.4329	39.9601	0	98.8929
57	0.226123	0.481702	0.292176	1.73295	0.142835	0.427848	0.690998	0.162727	0.090928	54.3456	1.5178	39.7359	0	98.8476
58	0.209729	0.47781	0.312461	1.74146	0.148984	0.535565	0.672389	0.145864	0.055236	54.0931	1.4262	40.7538	0	99.5726
59	0.200688	0.399256	0.400057	1.45238	0.154356	0.46581	0.643412	0.135722	0.096359	54.3368	1.36211	40.7885	0	99.4354
60	0.22734	0.61523	0.15743	2.24304	0.190606	0.410794	0.336918	0.119762	0.076703	54.2713	1.54646	40.47	0	99.6656
Effusive - Matrix Apatite 21 - traverse 2_1							Angle with the c-axis from EBSD			19
0	0.188274	0.662023	0.149703	2.43099	0.123411	0.322694	0.995389	0.135105	0.001781	53.7572	1.28992	41.0475	0	100.104
1	0.194164	0.640997	0.164839	2.35619	0.105012	0.351318	1.3481	0.150206	0.085844	54.3733	1.33164	40.6689	4e-06	100.771
2	0.165485	0.632826	0.20169	2.31983	0.078759	0.371412	0.969016	0.102846	0.087694	54.3862	1.13186	40.7415	4e-06	100.189
3	0.159768	0.575138	0.265094	2.09482	0.12839	0.383687	0.898315	0.147516	0.109231	54.3476	1.08574	40.4635	4e-06	99.6588
4	0.154431	0.584221	0.261349	2.13595	0.072979	0.392422	0.590369	0.139176	0.060936	54.245	1.05344	40.922	0	99.6122
5	0.158991	0.601069	0.23994	2.19429	0.065226	0.391554	0.490778	0.09398	0.073448	54.3362	1.08294	40.7735	0	99.502
6	0.170352	0.581439	0.248209	2.12752	0.165469	0.405396	0.609825	0.112336	0.034027	54.503	1.163	40.7705	0	99.8911
7	0.169482	0.567891	0.262627	2.07843	0.185109	0.434654	0.640426	0.094079	0.084276	54.2985	1.15733	40.8821	4e-06	99.8549
8	0.166315	0.564514	0.269171	2.04811	0.099267	0.435034	0.74513	0.116148	0.05915	53.9476	1.12583	40.4724	0	99.0487
9	0.18184	0.559338	0.258822	2.02974	0.132731	0.418039	0.569853	0.122232	0.141591	54.082	1.23117	40.4321	0	99.1595
10	0.177602	0.546755	0.275643	1.98494	0.166557	0.423416	0.680412	0.136569	0.073098	54.1631	1.203	40.4155	4e-06	99.2465
11	0.183172	0.519924	0.296904	1.88329	0.156104	0.417608	0.27709	0.124459	0.066023	54.417	1.23794	40.3654	-1e-05	98.9449
12	0.185443	0.492218	0.322339	1.78527	0.199933	0.409466	0.549676	0.145835	0.121184	54.1644	1.25493	40.507	0	99.1377
13	0.19032	0.51722	0.29246	1.87557	0.130585	0.423617	0.491028	0.127286	0.098127	54.0645	1.28767	40.521	8e-06	99.0194
14	0.19829	0.503391	0.298319	1.83784	0.149783	0.432862	0.603228	0.121056	0.10515	54.4974	1.35072	40.725	0	99.823
15	0.205008	0.516124	0.278867	1.87945	0.121255	0.425326	0.599284	0.11969	0.060606	54.2089	1.39287	40.6715	0	99.4789
16	0.190574	0.474827	0.334599	1.71923	0.084236	0.437821	0.53965	0.105276	0.035677	54.0991	1.28743	40.5305	0	98.8389
17	0.192901	0.45042	0.356679	1.63705	0.16981	0.412664	0.366813	0.115646	0.087482	54.0856	1.3081	40.8867	0	99.0698
18	0.184477	0.517581	0.297942	1.89055	0.13881	0.403234	0.334221	0.140872	0.092786	54.1196	1.25723	41.0756	0	99.4529
19	0.215012	0.568547	0.216442	2.06617	0.0552	0.378828	0.353496	0.114205	0.08567	54.281	1.45789	40.4827	4e-06	99.2751
20	0.190266	0.493876	0.315858	1.80637	0.143539	0.404688	0.372891	0.168961	0.033888	54.3509	1.29841	41.0851	0	99.6648
21	0.215795	0.480442	0.303764	1.73211	0.076006	0.40812	0.588611	0.126262	0.065966	53.8714	1.45157	40.2584	4e-06	98.5785
22	0.212104	0.453209	0.334687	1.63486	0.13476	0.421453	0.656308	0.124438	0.082061	54.2795	1.42756	40.1075	0	98.8685
23	0.232985	0.58317	0.183844	2.09754	0.09173	0.461139	1.03434	0.115376	0.092589	53.8748	1.56353	39.5514	4e-06	98.8824
24	0.207874	0.462702	0.329423	1.67582	0.158137	0.455159	0.57665	0.129155	0.112388	53.594	1.40472	40.7022	0	98.8082
25	0.207537	0.49419	0.298273	1.79045	0.127146	0.424125	0.600503	0.129573	0.107007	54.0181	1.4029	40.4535	0	99.0533
26	0.221205	0.508227	0.270568	1.8621	0.113126	0.414294	0.64389	0.117454	0.085633	54.8977	1.51218	40.7123	0	100.359
27	0.211599	0.469979	0.318422	1.71288	0.204536	0.439019	0.777317	0.149637	0.037422	53.9328	1.43888	40.8538	0	99.5463
28	0.241999	0.564928	0.193073	2.0437	0.090773	0.484415	1.36829	0.142453	0.124591	53.9064	1.63343	39.7854	0	99.5794
29	0.224941	0.517445	0.257614	1.86577	0.089418	0.443013	0.741236	0.152439	0.062393	53.7361	1.5133	40.1113	0	98.715
30	0.206683	0.435972	0.357346	1.57052	0.088764	0.388813	0.347767	0.12169	0.099957	54.1365	1.38916	40.3095	0	98.4527
31	0.224857	0.462096	0.313047	1.6826	0.060638	0.437706	0.631811	0.112739	0.123062	54.3643	1.52763	40.6742	0	99.6146
32	0.233142	0.482374	0.284484	1.73778	0.1159	0.419529	0.595265	0.13944	0.067801	53.9709	1.56709	40.0706	0	98.6843
33	0.227879	0.463023	0.309099	1.69176	0.133339	0.412007	0.572739	0.144558	0.110578	53.951	1.55347	41.1076	4e-06	99.677
34	0.22459	0.500754	0.274657	1.81313	0.037677	0.415454	0.635684	0.136184	0.130252	54.1942	1.51725	40.2835	0	99.1633
35	0.236301	0.53774	0.225959	1.94082	0.106743	0.424236	0.587281	0.098297	0.107081	53.8453	1.59126	40.1125	0	98.8135
36	0.227863	0.476868	0.295269	1.72782	0.092378	0.4046	0.371398	0.130024	0.082037	54.1187	1.54041	40.526	0	98.9934
37	0.222854	0.44752	0.329626	1.62299	0.125312	0.434012	0.415095	0.159064	0.167682	53.9015	1.50795	40.7057	4e-06	99.0393
38	0.218204	0.444099	0.337697	1.60508	0.12026	0.39366	0.353598	0.086067	0.062431	54.1282	1.47144	40.4898	0	98.7106
39	0.226367	0.466311	0.307322	1.6966	0.096466	0.409539	0.34628	0.123629	0.039283	54.1568	1.53667	40.8427	0	99.248
40	0.226027	0.455915	0.318058	1.64857	0.143829	0.403192	0.332496	0.12349	0.11417	54.0429	1.52492	40.475	0	98.8086
Effusive - Matrix Apatite 21 - traverse 2_2							Angle with the c-axis from EBSD			19
0	0.201067	0.679603	0.11933	2.42779	0.126655	0.365941	0.686473	0.138352	0.017813	53.7259	1.34017	39.1938	0	98.0229
1	0.178394	0.650216	0.171389	2.36384	0.054787	0.367198	0.559248	0.126092	0.051631	54.161	1.21005	40.3775	0	99.2713
2	0.178877	0.662428	0.158694	2.41469	0.143345	0.380157	0.553927	0.105151	0.121154	54.3107	1.21658	40.3931	4e-06	99.6388
3	0.176552	0.659157	0.164291	2.40954	0.139148	0.388272	0.518353	0.128479	0.040962	54.5084	1.20415	40.5232	8e-06	99.8605
4	0.192504	0.624019	0.183477	2.26986	0.147149	0.386001	0.643147	0.151712	0.067614	53.9925	1.30648	40.4305	4e-06	99.3949
5	0.178322	0.621558	0.20012	2.26584	0.165346	0.39	0.652007	0.134948	0.046275	54.0031	1.21287	40.6173	0	99.4877
6	0.18881	0.617849	0.193341	2.23117	0.11371	0.408583	0.867417	0.133975	0.083624	53.7791	1.27215	39.9842	0	98.874
7	0.171445	0.56676	0.261795	2.05489	0.133612	0.42198	0.68858	0.136318	0.092546	54.3609	1.15978	40.1966	4e-06	99.2452
8	0.199696	0.52208	0.278224	1.87022	0.10387	0.430726	1.0859	0.132525	0.104945	54.0119	1.33471	39.4464	0	98.5211
9	0.179384	0.545954	0.274661	2.0012	0.101595	0.405618	0.712576	0.16116	0.112161	54.0525	1.22682	41.1413	0	99.915
10	0.194613	0.611311	0.194076	2.21464	0.106503	0.452121	0.948167	0.128833	0.062258	54.022	1.31545	40.0295	0	99.2794
11	0.185127	0.527591	0.287282	1.91166	0.111182	0.431758	0.645515	0.122669	0.103127	53.9775	1.25154	40.4393	0	98.9942
12	0.197836	0.530422	0.271742	1.91571	0.098947	0.429477	0.740751	0.138647	0.119231	53.8503	1.33314	40.1997	0	98.8259
13	0.175694	0.577847	0.246459	2.09208	0.118408	0.42622	0.552495	0.125182	0.113957	53.5699	1.18682	40.514	0	98.699
14	0.197214	0.532833	0.269953	1.92175	0.144683	0.432957	0.803044	0.134435	0.138783	53.7116	1.32711	40.1192	4e-06	98.7335
15	0.190357	0.525845	0.283798	1.90896	0.15167	0.440492	0.693575	0.138702	0.044491	54.1419	1.28935	40.4421	4e-06	99.2513
16	0.2055	0.521848	0.272652	1.88989	0.206184	0.437617	0.636761	0.120527	0.119317	53.7789	1.38857	40.418	0	98.9957
17	0.196657	0.448455	0.354888	1.62235	0.128735	0.404142	0.431974	0.112154	0.076621	53.9492	1.32739	40.635	0	98.6875
18	0.209755	0.517948	0.272297	1.86003	0.100638	0.431957	0.584363	0.142468	0.067679	54.0406	1.40543	39.7886	0	98.4217
19	0.204556	0.491893	0.30355	1.78263	0.090435	0.439084	0.694824	0.133603	0.096166	53.7537	1.38314	40.5911	0	98.9647
20	0.216586	0.50049	0.282924	1.80867	0.197528	0.457199	0.698261	0.130327	0.087263	53.9291	1.46035	40.1939	0	98.9626
21	0.207446	0.475148	0.317406	1.71819	0.172999	0.435732	0.670576	0.104615	0.113965	54.2832	1.39962	40.1922	4e-06	99.0911
22	0.211135	0.477543	0.311322	1.73745	0.173697	0.443198	0.62449	0.173853	0.078393	54.4502	1.43325	40.5051	0	99.6196
23	0.218596	0.482983	0.298421	1.74057	0.132669	0.433582	0.846972	0.125608	0.083647	53.5164	1.46982	40.2459	0	98.5951
24	0.218062	0.440024	0.341913	1.57869	0.15848	0.449251	0.748926	0.154687	0.033854	54.1268	1.4597	39.7672	0	98.4777
25	0.222495	0.453768	0.323737	1.63953	0.141821	0.42932	0.774837	0.115481	0.098033	53.8533	1.49992	40.3482	4e-06	98.9005
26	0.197808	0.506928	0.295263	1.83496	0.140507	0.426906	0.834021	0.140673	0.071256	53.846	1.33594	40.3758	0	99.0061
27	0.225402	0.455088	0.31951	1.64872	0.172202	0.416247	0.774855	0.143879	0.142462	53.964	1.5236	40.4368	8e-06	99.2228
28	0.214133	0.495184	0.290683	1.80028	0.112073	0.452884	1.17165	0.136477	0.069468	53.9204	1.45251	40.488	0	99.6038
29	0.246713	0.52012	0.233167	1.87243	0.1205	0.496111	1.965	0.136163	0.095915	53.0269	1.65713	39.7589	0	99.129
30	0.206261	0.45203	0.341709	1.63629	0.125512	0.467314	1.90546	0.142538	0.089018	53.7207	1.39307	40.1166	4e-06	99.5964
31	0.235002	0.480542	0.284456	1.7423	0.179053	0.476274	1.43381	0.134131	0.133556	53.5615	1.58974	40.2998	0	99.5502
32	0.243694	0.468559	0.287747	1.68957	0.113176	0.426506	1.1452	0.136485	0.010679	53.31	1.63953	40.2719	0	98.743
33	0.236836	0.481123	0.282041	1.74203	0.082261	0.423135	0.841691	0.119674	0.128311	53.9382	1.59996	40.3321	4e-06	99.2073
34	0.236444	0.459811	0.303745	1.66316	0.132647	0.425151	0.909533	0.116924	0.074874	53.6191	1.59568	40.4459	4e-06	98.983
35	0.232542	0.45808	0.309377	1.65481	0.073886	0.424256	0.884292	0.11358	0.094437	53.7153	1.56737	40.36	0	98.8878
36	0.229654	0.469132	0.301214	1.70035	0.123605	0.424587	0.836918	0.103873	0.030318	53.8236	1.55303	40.5256	0	99.1218
37	0.227787	0.486385	0.285828	1.75949	0.066911	0.434559	0.746554	0.116614	0.074981	53.9503	1.53744	40.326	4e-06	99.0129
38	0.238408	0.496581	0.265011	1.8102	0.090662	0.411651	0.665108	0.138485	0.053503	54.5596	1.62151	40.5211	0	99.8718
39	0.217606	0.52925	0.253144	1.92	0.110843	0.434778	0.813272	0.108114	0.126654	53.3605	1.4729	40.6737	8e-06	99.0208
40	0.229518	0.42592	0.344562	1.53266	0.096439	0.427772	0.638401	0.146469	0.071369	54.2312	1.54098	40.0055	4e-06	98.6908
41	0.232286	0.424385	0.343329	1.53439	0.090415	0.427536	0.67744	0.123502	0.057078	54.2819	1.56697	40.3005	0	99.0597
42	0.227869	0.453898	0.318233	1.65312	0.160614	0.431723	0.513806	0.148766	0.098109	54.5025	1.54844	40.6309	0	99.688
43	0.232518	0.484334	0.283147	1.74913	0.134518	0.398063	0.530761	0.107508	0.057032	54.1195	1.56674	40.2067	0	98.8699
44	0.227215	0.470335	0.302451	1.71226	0.083832	0.415671	0.562765	0.149653	0.092701	54.0315	1.54334	40.8255	0	99.4172
45	0.237346	0.420493	0.342161	1.51842	0.252261	0.426027	0.373453	0.139597	0.116121	54.0428	1.59911	40.3582	4e-06	98.826
Vulcanian - Matrix Apatite 3 - traverse 1							Angle with the c-axis from EBSD			12
0	0.207234	0.474136	0.318631	1.64606	0.130459	0.372452	0.487943	0.109904	0.112343	51.7146	1.34235	38.8989	0	94.815
1	0.190197	0.420314	0.389489	1.54835	0.119703	0.423139	0.581903	0.164631	0.07667	54.6008	1.30726	41.5638	4e-06	100.386
2	0.185466	0.364963	0.449571	1.33095	0.133377	0.410161	0.559689	0.1267	0.126575	54.5809	1.26194	41.0499	0	99.5802
3	0.192374	0.37216	0.435465	1.35943	0.231745	0.416153	0.556441	0.146505	0.089237	54.7875	1.3111	40.9747	0	99.8728
4	0.199161	0.353848	0.446991	1.29633	0.165011	0.410708	0.565892	0.121753	0.032142	54.932	1.36134	41.1921	0	100.077
5	0.202087	0.359471	0.438441	1.31821	0.171324	0.404493	0.482263	0.139385	0.069548	54.8343	1.38268	41.3035	0	100.106
6	0.200911	0.351152	0.447937	1.28047	0.192634	0.416642	0.565204	0.139322	0.046346	54.7127	1.36691	40.9545	8e-06	99.6747
7	0.202321	0.358988	0.438691	1.31677	0.203138	0.404688	0.544759	0.118784	0.090937	54.5739	1.38463	41.4169	0	100.055
8	0.204775	0.362526	0.432699	1.32196	0.167707	0.428994	0.569476	0.129587	0.062441	54.4868	1.39322	41.0289	0	99.5891
9	0.196308	0.352829	0.450863	1.29268	0.129957	0.402016	0.498458	0.115103	0.110618	54.5297	1.34192	41.4419	4e-06	99.8623
10	0.201941	0.35228	0.44578	1.28318	0.238319	0.426731	0.535017	0.124937	0.007129	54.5249	1.37242	40.9679	0	99.4806
11	0.203658	0.36524	0.431102	1.32717	0.188736	0.399159	0.516766	0.115481	0.133711	54.1797	1.38074	40.9556	4e-06	99.1971
12	0.206136	0.366699	0.427165	1.33755	0.218729	0.42627	0.552115	0.163307	0.112384	53.8904	1.40287	41.294	8e-06	99.3976
13	0.202116	0.371773	0.426111	1.34959	0.129179	0.395849	0.564173	0.148285	0.080257	54.2736	1.36895	40.8387	4e-06	99.1486
14	0.196574	0.351943	0.451483	1.27493	0.156109	0.398726	0.556845	0.139502	0.060686	54.2044	1.32863	40.7953	4e-06	98.9151
15	0.199689	0.337948	0.462363	1.21567	0.207465	0.388431	0.597421	0.145926	0.02853	54.2645	1.34024	40.2858	0	98.474
16	0.206722	0.341539	0.451739	1.23123	0.1461	0.385492	0.569321	0.136677	0.064268	54.4633	1.39043	40.3394	4e-06	98.7262
17	0.199509	0.351849	0.448642	1.27768	0.152989	0.415319	0.535182	0.143106	0.114132	54.5068	1.35173	40.7844	4e-06	99.2813
Vulcanian - Matrix Apatite 3 - traverse 2							Angle with the c-axis from EBSD			12
0	0.175768	0.390508	0.433724	1.47427	0.177126	0.413154	0.599235	0.108447	0.091104	54.0291	1.23808	42.7874	0	100.918
1	0.173857	0.350564	0.475579	1.31058	0.120978	0.418056	0.575329	0.131549	0.098396	53.5959	1.21269	42.5669	0	100.03
2	0.159829	0.32564	0.514532	1.24118	0.226465	0.427922	0.527905	0.117922	0.009724	55.288	1.13662	42.9713	0	101.947
3	0.194649	0.348918	0.456433	1.316	0.211299	0.40442	0.56353	0.112238	0.007286	53.7617	1.36977	43.0093	0	100.756
4	0.188012	0.313845	0.498143	1.17723	0.1684	0.448955	0.526753	0.159383	0.154295	53.7206	1.31581	42.8386	4e-06	100.51
5	0.194385	0.309972	0.495643	1.16821	0.123566	0.399082	0.558648	0.144413	0.115496	53.5694	1.36686	43.2804	0	100.726
6	0.191744	0.31041	0.497847	1.15113	0.143013	0.393592	0.564654	0.12358	0.091151	53.4919	1.3267	42.1486	0	99.4343
7	0.188349	0.313802	0.497849	1.17854	0.133981	0.407541	0.521046	0.150996	0.117936	54.2148	1.31982	42.6998	-1e-05	100.744
8	0.188799	0.341408	0.469793	1.27549	0.16955	0.432964	0.503093	0.150515	0.092386	53.213	1.31603	42.7604	-1e-05	99.9134
9	0.185591	0.330616	0.483793	1.24155	0.12903	0.408753	0.494546	0.16664	0.051089	54.1618	1.30035	42.7457	4e-06	100.699
10	0.187616	0.328044	0.48434	1.23563	0.098037	0.420516	0.516679	0.115648	0.081491	54.2464	1.31853	42.9481	0	100.981
11	0.188714	0.336711	0.474575	1.26795	0.156154	0.429101	0.509098	0.142512	0.051071	54.3359	1.3259	42.8579	0	101.076
12	0.183066	0.330193	0.486741	1.25431	0.136949	0.419563	0.495484	0.129808	0.086349	54.3233	1.2975	43.5038	0	101.647
13	0.184858	0.317129	0.498013	1.20148	0.166957	0.403087	0.550497	0.117925	0.09356	53.6141	1.30672	43.7238	0	101.178
14	0.185253	0.355745	0.459001	1.34461	0.145457	0.40471	0.629596	0.098586	0.068051	54.1288	1.30643	43.121	0	101.247
15	0.183427	0.321994	0.494578	1.20651	0.15138	0.412945	0.525177	0.140524	0.069253	54.1019	1.28236	42.6344	0	100.524
Vulcanian - Matrix Apatite 4 - traverse 1							Angle with the c-axis from EBSD			9.9
0	0.212602	0.400626	0.386773	1.44718	0.075786	0.422039	0.607961	0.118411	0.132098	53.9915	1.43289	40.3652	0	98.5931
1	0.208186	0.373994	0.41782	1.37282	0.038259	0.415794	0.694685	0.086619	0.118547	54.2218	1.42581	41.5188	8e-06	99.8931
2	0.214807	0.34617	0.439023	1.25204	0.050647	0.407628	0.624674	0.121752	0.07096	54.3002	1.44957	40.562	0	98.8395
3	0.212511	0.338755	0.448733	1.24547	0.168319	0.407262	0.619534	0.132546	0.123471	54.8222	1.45778	41.4046	0	100.381
4	0.236542	0.361513	0.401944	1.31512	0.018681	0.403523	0.648713	0.106605	0.090556	54.8047	1.60551	40.6391	8e-06	99.6325
5	0.220482	0.320323	0.459194	1.16125	0.027536	0.403261	0.600077	0.14919	0.112545	54.667	1.49133	40.6297	0	99.2419
6	0.228355	0.350451	0.421194	1.28959	0.067624	0.399963	0.697518	0.105184	0.157868	55.5942	1.56783	41.0311	0	100.911
7	0.225701	0.337457	0.436842	1.23634	0.156276	0.42964	0.62384	0.136802	0.13569	54.6947	1.54282	41.1744	0	100.131
8	0.235261	0.355509	0.40923	1.29738	0.023432	0.403884	0.630981	0.135943	0.056274	55.0111	1.60188	40.7775	0	99.9384
9	0.231055	0.361444	0.4075	1.3128	0.049662	0.422434	0.604897	0.129753	0.116185	54.3709	1.5658	40.7207	4e-06	99.2931
10	0.228604	0.360219	0.411177	1.32617	0.059154	0.389196	0.583611	0.113676	0.108858	54.5524	1.57029	41.6169	0	100.32
11	0.226951	0.35267	0.420379	1.28241	0.071393	0.403996	0.640089	0.15816	0.057473	54.6009	1.53976	40.726	0	99.4802
12	0.233975	0.371512	0.394513	1.35829	0.063973	0.409099	0.627226	0.139376	0.094277	54.878	1.59607	40.8751	0	100.041
13	0.216909	0.330663	0.452428	1.21806	0.040078	0.404766	0.583007	0.133138	0.128464	54.4599	1.49081	41.7942	4e-06	100.252
14	0.22727	0.326757	0.445973	1.19404	0.056789	0.413269	0.614192	0.10841	0.167489	54.2169	1.54953	41.3083	0	99.6289
15	0.227705	0.325803	0.446492	1.19257	0.055498	0.407306	0.6203	0.137833	0.088067	54.402	1.55512	41.3448	4e-06	99.8035
16	0.228362	0.314696	0.456942	1.16252	0.07047	0.422968	0.59398	0.130732	0.063611	55.1173	1.57397	41.654	0	100.79
17	0.235951	0.336977	0.427072	1.22302	0.088347	0.400044	0.57465	0.114574	0.130835	54.2734	1.59778	40.7717	0	99.1744
18	0.227655	0.330811	0.441534	1.21613	0.05761	0.399017	0.578033	0.125957	0.05502	54.2405	1.56149	41.7395	4e-06	99.9733
19	0.234757	0.333184	0.432058	1.22068	0.077359	0.396096	0.514339	0.154496	0.127283	54.4097	1.60472	41.3981	4e-06	99.9028
20	0.228967	0.31398	0.457052	1.13779	0.092131	0.429146	0.541968	0.127633	0.095581	54.3273	1.54809	40.7081	0	99.0077
21	0.22242	0.318275	0.459306	1.16672	0.110827	0.400451	0.530328	0.14739	0.099119	53.6961	1.52125	41.8344	0	99.5066
22	0.229438	0.327887	0.442675	1.1995	0.047046	0.398581	0.550091	0.138397	0.102818	54.3118	1.56605	41.3984	0	99.7127
Vulcanian - Matrix Apatite 4 - traverse 2							Angle with the c-axis from EBSD			9.9
0	0.216081	0.405558	0.378361	1.48585	0.065999	0.411715	0.534513	0.115871	0.097712	54.4954	1.47707	41.0084	0	99.6925
1	0.213134	0.376792	0.410074	1.38251	0.091447	0.406529	0.560118	0.125744	0.07323	53.5945	1.45909	41.6886	0	99.3818
2	0.212932	0.349135	0.437933	1.26912	0.078617	0.418135	0.527482	0.115302	0.093962	53.87	1.44415	41.0508	0	98.8676
3	0.219034	0.324782	0.456184	1.18803	0.062002	0.398439	0.520045	0.117228	0.079346	54.3937	1.49489	41.3462	0	99.5999
4	0.220656	0.311299	0.468045	1.15763	0.070319	0.403306	0.53335	0.115356	0.168443	54.1029	1.53098	42.687	0	100.769
5	0.230948	0.345402	0.42365	1.26038	0.046565	0.406842	0.524776	0.123837	0.139146	54.0352	1.57237	41.2496	0	99.3587
6	0.225188	0.345471	0.429341	1.27329	0.091892	0.417538	0.454996	0.111115	0.15016	53.6504	1.54854	42.1874	0	99.8853
7	0.218713	0.295964	0.485323	1.09219	0.074416	0.393432	0.499379	0.143816	0.07208	54.4346	1.5059	42.06	0	100.276
8	0.222458	0.340353	0.437189	1.25065	0.009451	0.402431	0.494634	0.117387	0.15525	54.5129	1.52516	41.5676	0	100.035
9	0.234005	0.330303	0.435692	1.21283	0.088383	0.396744	0.518321	0.124035	0.124673	53.5449	1.60315	41.9765	0	99.5895
10	0.235446	0.328648	0.435905	1.209	0.048749	0.394174	0.487186	0.127833	0.099035	54.3899	1.61603	41.7329	0	100.105
11	0.22558	0.335693	0.438727	1.22167	0.073667	0.412107	0.482056	0.124058	0.111301	54.7255	1.5317	40.7693	0	99.4514
12	0.230056	0.317894	0.45205	1.16524	0.116385	0.391451	0.509346	0.138808	0.144357	53.973	1.57336	41.6744	0	99.6863
13	0.226413	0.333225	0.440362	1.22673	0.085708	0.393358	0.47	0.170591	0.106454	54.1542	1.55516	41.8606	0	100.023
14	0.224066	0.327902	0.448032	1.20614	0.050415	0.409124	0.454076	0.122267	0.108929	54.6473	1.53777	41.6142	0	100.15
15	0.232244	0.349985	0.417771	1.27646	0.056395	0.423299	0.523316	0.122768	0.083227	53.7861	1.58039	41.3131	0	99.1651
16	0.223811	0.316494	0.459694	1.15836	0.064072	0.385683	0.540693	0.130782	0.1028	54.3395	1.52835	41.4312	0	99.6814
17	0.234728	0.325449	0.439823	1.17598	0.004576	0.418477	0.520193	0.1177	0.018377	53.6918	1.5825	40.8561	0	98.3857
18	0.234512	0.33033	0.435158	1.21922	0.053955	0.421639	0.530179	0.104318	0.097958	54.1877	1.61496	42.0035	0	100.233
19	0.223223	0.322069	0.454707	1.16659	0.076819	0.403357	0.450073	0.126079	0.048957	53.9364	1.50859	40.9207	0	98.6376
20	0.226972	0.315304	0.457724	1.16556	0.094691	0.412651	0.537672	0.133128	0.143151	55.1052	1.56545	41.6614	0	100.819
21	0.230452	0.348673	0.420875	1.28737	0.055635	0.400797	0.491603	0.104622	0.105159	55.1381	1.58755	41.5277	0	100.699
22	0.232528	0.330807	0.436665	1.21225	0.065573	0.405935	0.618328	0.110871	0.15661	54.3436	1.58985	41.373	0	99.876
Vulcanian - Matrix Apatite 4bis - traverse 1							Angle with the c-axis from EBSD			25
0	0.187767	0.337255	0.474978	1.23289	0.101399	0.45015	0.572544	0.1235	0.114847	53.9279	1.2807	41.4	0	99.2039
1	0.182302	0.290458	0.52724	1.06446	0.100471	0.423123	0.485664	0.160882	0.075764	54.5931	1.24652	41.3846	4e-06	99.5346
2	0.19047	0.283758	0.525772	1.03592	0.077726	0.406655	0.565193	0.119246	0.050095	54.3976	1.29738	41.2024	0	99.1522
3	0.194138	0.273119	0.532743	0.998081	0.073822	0.416449	0.531175	0.112615	0.069651	53.9965	1.32369	41.5055	0	99.0275
4	0.193573	0.26245	0.543978	0.961055	0.089503	0.421099	0.502438	0.124961	0.006104	53.6709	1.32254	41.8499	4e-06	98.9485
5	0.192353	0.276184	0.531463	0.979971	0.112117	0.421805	0.496874	0.110781	0.041561	52.6946	1.27343	40.1664	4e-06	96.2975
6	0.191827	0.259951	0.548222	0.947761	0.103511	0.421874	0.472251	0.138115	0.113602	54.1799	1.30491	41.2961	0	98.978
7	0.189204	0.275635	0.535161	1.0106	0.127833	0.409343	0.543499	0.145214	0.097724	54.5561	1.29431	41.3999	4e-06	99.5845
8	0.1938	0.271412	0.534788	0.996668	0.051432	0.408934	0.49279	0.132004	0.032998	54.4266	1.32782	41.6653	0	99.5345
9	0.192248	0.278565	0.529187	1.02752	0.069979	0.414923	0.491603	0.12917	0.086753	54.4391	1.32309	41.9145	0	99.8966
10	0.188386	0.265126	0.546488	0.990837	0.111527	0.42968	0.482901	0.145722	0.09529	54.8822	1.31359	42.6318	0	101.084
11	0.187083	0.267838	0.545079	0.994937	0.109059	0.412411	0.504459	0.119832	0.077055	54.9054	1.29664	42.2433	0	100.663
12	0.195628	0.270472	0.5339	0.995342	0.074292	0.41504	0.496727	0.136489	0.068536	54.5306	1.34321	41.7154	0	99.7756
13	0.191299	0.250646	0.558055	0.925027	0.089642	0.408581	0.522378	0.124704	0.097951	54.5266	1.31725	42.0021	0	100.014
14	0.189286	0.273976	0.536738	1.01066	0.132862	0.415861	0.463134	0.154222	0.112738	54.5152	1.30279	41.8906	0	99.9981
15	0.196243	0.28103	0.522726	1.02582	0.063007	0.423182	0.502519	0.126711	0.068627	53.968	1.33652	41.4418	0	98.9562
16	0.196827	0.278261	0.524912	1.01007	0.091082	0.413618	0.52805	0.127666	0.132371	54.2132	1.33305	40.9174	0	98.7665
17	0.190833	0.28366	0.525506	1.0327	0.100131	0.415428	0.533544	0.12199	0.131161	53.9959	1.29626	41.2233	0	98.8504
Vulcanian - Matrix Apatite 18 - traverse 1							Angle with the c-axis from EBSD			0
0	0.22476	0.552815	0.222426	1.48075	0.142814	0.424843	0.558438	0.144531	0.11644	54.0992	1.07437	41.9446	0	99.986
1	0.201161	0.384509	0.41433	1.64543	0.098054	0.413696	0.493341	0.155419	0.080083	53.2006	1.33803	41.9313	0	99.356
2	0.19164	0.358591	0.449769	2.01346	0.09704	0.391089	0.569005	0.115333	0.04852	52.8431	1.52737	40.5657	0	98.1706
3	0.206779	0.435576	0.357645	1.40952	0.12489	0.433442	0.493988	0.154112	0.052216	52.7386	1.37585	41.6123	0	98.3949
4	0.207698	0.422084	0.370219	1.31839	0.047986	0.444925	0.494424	0.126746	0.11052	54.0995	1.3146	41.3202	0	99.2773
5	0.205969	0.463186	0.330845	1.61505	0.116698	0.444005	0.564449	0.127192	0.060683	53.2888	1.43051	41.9875	0	99.6349
6	0.211796	0.439474	0.34873	1.5681	0.120253	0.436585	0.497364	0.126341	0.072872	53.3304	1.43969	42.1607	0	99.7523
7	0.198863	0.396845	0.404292	1.71382	0.112106	0.421251	0.496794	0.145179	0.072878	53.7524	1.42192	41.5154	0	99.6517
8	0.198554	0.40554	0.395906	1.62071	0.159252	0.417215	0.488643	0.12865	0.064364	53.6589	1.45731	41.2926	0	99.2876
9	0.205023	0.400383	0.394594	1.48602	0.1036	0.44733	0.494924	0.14562	0.036429	54.1566	1.38938	42.2562	4e-06	100.516
10	0.211458	0.426615	0.361926	1.52513	0.133139	0.441787	0.551743	0.118292	0.082573	54.0534	1.3932	42.5365	0	100.836
11	0.208768	0.410523	0.380709	1.47678	0.126655	0.411568	0.53533	0.13765	0.114201	53.9489	1.41093	41.1225	0	99.2845
12	0.195014	0.370791	0.434195	1.59669	0.118659	0.429185	0.525881	0.112635	0.085002	53.9426	1.47663	42.0846	4e-06	100.372
13	0.197926	0.390398	0.411677	1.52401	0.158966	0.430582	0.508086	0.1235	0.065593	53.446	1.44603	41.7773	0	99.4801

## Sheet: Diffusion modeling
1) Diffusion coefficients	(if No EBSD data is available, we apply the diffusion coefficients taking an angle of 0° with c)
	EBSD	At T = 925°C			At T = 950°C			At T = 975°C
Sample	Angle with c-axis (°)	D_Cl (m/s)	D_F (m/s)	D_OH (m/s)	D_Cl (m/s)	D_F (m/s)	D_OH (m/s)	D_Cl (m/s)	D_F (m/s)	D_OH (m/s)
Sub-plinian - Matrix Apatite 1	7	1.065e-17	1.918e-17	1.165e-19	1.947e-17	3.606e-17	2.65e-19	3.474e-17	6.615e-17	5.839e-19
Sub-plinian - Matrix Apatite 6	NO EBSD	1.081e-17	1.941e-17	1.18e-19	1.976e-17	3.655e-17	2.688e-19	3.5e-17	6.7e-17	5.9e-19
Sub-plinian - Matrix Apatite 11	NO EBSD	1.081e-17	1.941e-17	1.18e-19	1.976e-17	3.655e-17	2.688e-19	3.5e-17	6.7e-17	5.9e-19
Effusive - Matrix Apatite 4	10.5	1.045e-17	1.89e-17	1.145e-19	1.911e-17	3.547e-17	2.603e-19	3.409e-17	6.499e-17	5.732e-19
Effusive - Matrix Apatite 6	12.3	1.033e-17	1.871e-17	1.132e-19	1.887e-17	3.507e-17	2.572e-19	3.367e-17	6.422e-17	5.662e-19
Effusive - Matrix Apatite 21	19	9.685e-18	1.778e-17	1.068e-19	1.769e-17	3.31e-17	2.416e-19	3.15e-17	6e-17	5.3e-19
Vulcanian - Matrix Apatite 3	12	1.035e-17	1.875e-17	1.134e-19	1.891e-17	3.514e-17	2.577e-19	3.374e-17	6.436e-17	5.674e-19
Vulcanian - Matrix Apatite 4	9.9	1.049e-17	1.896e-17	1.149e-19	1.918e-17	3.558e-17	2.613e-19	3.422e-17	6.522e-17	5.753e-19
Vulcanian - Matrix Apatite 4bis	25	8.918e-18	1.666e-17	9.909e-20	1.627e-17	3.073e-17	2.23e-19	2.9e-17	5.582e-17	4.888e-19
Vulcanian - Matrix Apatite 18	NO EBSD	1.081e-17	1.941e-17	1.18e-19	1.976e-17	3.655e-17	2.688e-19	3.5e-17	6.7e-17	5.9e-19
2) Boundary conditions
	x0			xmax
Traverse	x_Cl	x_F	x_OH	x_Cl	x_F	x_OH	Profile length (μm)
Sub-plinian - Matrix Apatite 1 - t1	0.199991	0.318968	0.48104	0.24	0.42	0.34	26
Sub-plinian - Matrix Apatite 6 - t1	0.182	0.434	0.384	0.175612	0.360944	0.463444	12
Sub-plinian - Matrix Apatite 6 - t2	0.176066	0.432441	0.391493	0.176131	0.379546	0.444323	12
Sub-plinian - Matrix Apatite 11 - t1	0.214881	0.352526	0.432593	0.234635	0.372526	0.392839	30
Effusive - Matrix Apatite 4 - t1_1	0.2	0.73	0.07	0.219	0.46	0.321	81
Effusive - Matrix Apatite 4 - t1_2	0.203	0.698	0.099	0.215	0.45	0.335	76
Effusive - Matrix Apatite 6 - t3_1	0.21	0.724	0.066	0.22	0.49	0.29	46
Effusive - Matrix Apatite 6 - t3_2	0.18	0.655	0.165	0.22	0.49	0.29	61
Effusive - Matrix Apatite 21 - t2_1	0.183	0.694	0.123	0.226027	0.455915	0.318058	41
Effusive - Matrix Apatite 21 - t2_2	0.201067	0.679603	0.11933	0.235	0.47	0.295	46
Vulcanian - Matrix Apatite 3 - t1	0.207	0.474	0.319	0.202	0.349	0.449	18
Vulcanian - Matrix Apatite 3 - t2	0.176	0.391	0.434	0.188	0.322	0.49	16
Vulcanian - Matrix Apatite 4 - t1	0.212602	0.400626	0.386773	0.229438	0.327887	0.442675	23
Vulcanian - Matrix Apatite 4 - t2	0.216081	0.405558	0.378361	0.232528	0.330807	0.436665	23
Vulcanian - Matrix Apatite 4bis - t1	0.187767	0.337255	0.474978	0.195	0.274	0.531	18
Vulcanian - Matrix Apatite 18 - t1	0.22476	0.552815	0.222426	0.21	0.39	0.4	14
3) Results - diffusion time (hours)
Traverse	T = 925°C	T = 950°C	T = 975°C	Comment
Sub-plinian - Matrix Apatite 1 - t1	28	20	12	reversed zoning - F leaving apatite, OH entering
Sub-plinian - Matrix Apatite 6 - t1	23	13	8
Sub-plinian - Matrix Apatite 6 - t2	10	5.5	4
Sub-plinian - Matrix Apatite 11 - t1	13	8	5	reversed zoning - F leaving apatite, OH entering
Effusive - Matrix Apatite 4 - t1_1	5500	3000	1800
Effusive - Matrix Apatite 4 - t1_2	4500	2500	1500
Effusive - Matrix Apatite 6 - t3_1	1800	1000	650
Effusive - Matrix Apatite 6 - t3_2	7500	4000	2200
Effusive - Matrix Apatite 21 - t2_1	3600	2000	1200
Effusive - Matrix Apatite 21 - t2_2	4200	2400	1300
Vulcanian - Matrix Apatite 3 - t1	65	32	20
Vulcanian - Matrix Apatite 3 - t2	49	24	15
Vulcanian - Matrix Apatite 4 - t1	75	42	25
Vulcanian - Matrix Apatite 4 - t2	85	50	28
Vulcanian - Matrix Apatite 4bis - t1	26	16	9
Vulcanian - Matrix Apatite 18	39	19	13
	number of point affected by diffusion
4) 1Normalized RMSD (at T=975°C)		Cl	F	OH
Sub-plinian - Matrix Apatite 1 - t1	5	0.0456942	0.0957152	0.108004
Sub-plinian - Matrix Apatite 6 - t1	4	0.0130824	0.0560064	0.0519142
Sub-plinian - Matrix Apatite 6 - t2	2	0.0217925	0.00506655	0.00422601
Sub-plinian - Matrix Apatite 11 - t1	3	0.0203474	0.0937153	0.0805894
Effusive - Matrix Apatite 4 - t1_1	55	0.0858682	0.0652419	0.134719
Effusive - Matrix Apatite 4 - t1_2	55	0.0883441	0.0795616	0.134735
Effusive - Matrix Apatite 6 - t3_1	25	0.061216	0.0556206	0.135574
Effusive - Matrix Apatite 6 - t3_2	58	0.173193	0.14068	0.198712
Effusive - Matrix Apatite 21 - t2_1	40	0.0565998	0.0811924	0.179933
Effusive - Matrix Apatite 21 - t2_2	40	0.0534722	0.0568782	0.109413
Vulcanian - Matrix Apatite 3 - t1	8	0.00450909	0.0258883	0.0250533
Vulcanian - Matrix Apatite 3 - t2	7	0.0447795	0.0359418	0.0345724
Vulcanian - Matrix Apatite 4 - t1	9	0.0261186	0.047275	0.0493816
Vulcanian - Matrix Apatite 4 - t2	9	0.0281645	0.0473196	0.0454901
Vulcanian - Matrix Apatite 4bis - t1	5	0.00616806	0.0211674	0.0134503
Vulcanian - Matrix Apatite 18	6	0.0161504	0.111337	0.132447
1RMSD refers to root mean square deviation and is defined in supplementary material

## Sheet: G50023
Bernard, O., et al., 2022, Explosive-effusive-explosive: The role of magma ascent rates and paths in modulating caldera eruptions: Geology, v. 50, https://doi.org/10.1130/G50023.1
